# Supplementary material
Source: PubMed Central journal article supplement (PMC1855089)
Supplement: NIHMS17365-supplement-01.pdf [file NIHMS17365-supplement-01.pdf]

## Supplemental Text

**Generation and Characterization of Single and Compound FoxO Mutant Mice Reveals Modest Neoplastic Phenotypes.** Each conditional allele retained wild type function as evidenced by normal FoxO expression and lack of a phenotype in homozygous mice and derivative cells (Supplemental Figures S1 and S2, and (Castrillon et al., 2003), see below; data not shown). Germline Cre-mediated recombination produced null alleles for each of the *FoxO* genes as confirmed by PCR, Southern, and Northern blot analyses (Supplemental Figures S1 and S2). Consistent with previous reports, *FoxO1* nullizygosity resulted in embryonic lethality *circa* E10.5, while *FoxO1*<sup>-/+</sup> mice were healthy and fertile (Furuyama et al., 2004; Hosaka et al., 2004). *FoxO3*<sup>-/-</sup> mice were viable and outwardly normal but developed mild hemolytic anemia, modest glucose intolerance, and premature female sterility due to global activation of primordial follicles soon after birth, as previously reported (Castrillon et al., 2003; Hosaka et al., 2004). Mice deficient for *FoxO4* were healthy and fertile with normal body weight and glucose tolerance (data not shown).

Each allele was backcrossed 3 times onto the FVBn background, after which serial intercrosses generated various experimental cohorts comprised of single and compound germline mutant mice (*FoxO3*<sup>-/-</sup>; *FoxO4*<sup>-/-</sup> and *FoxO1*<sup>-/+</sup>; *FoxO3*<sup>-/-</sup>; *FoxO4*<sup>-/-</sup>), triple conditional *FoxO1*<sup>L/L</sup>; *FoxO3*<sup>L/L</sup>; *FoxO4*<sup>L/L</sup> mice with and without the interferon-inducible Mx-Cre transgene (Kuhn et al., 1995), and wild type littermate controls. Overall survival as well as spontaneous and carcinogen-induced tumor formation was monitored in the various cohorts.

In the germline mutant series, aging *FoxO1*<sup>+/+</sup> and *FoxO1*<sup>-/+</sup> mice (n=31 and 52, respectively) showed no differences in overall survival, tumor incidence and

multiplicity ( $FoxO1^{+/+} = 0.9 \pm 0.1$  versus  $FoxO1^{-/-} = 0.9 \pm 0.1$  tumors per mouse), and tumor spectrum (primarily lung adenocarcinomas which are common neoplasms in aged FVBn animals) (Supplemental Table S1 and Figure S3a). Similarly, aging  $FoxO4^{+/+}$  and  $FoxO4^{-/-}$  mice (n=26 and 37, respectively) failed to exhibit significant differences in overall survival, tumor incidence and multiplicity ( $FoxO4^{+/+}$ ,  $0.7 \pm 0.1$ ;  $FoxO4^{-/-}$ ,  $1.0 \pm 0.2$  tumors per mouse), and tumor spectrum (Supplemental Figure S3b, and Table S1). While aged FVBn females are reported to develop occasional prolactinomas (Mahler et al., 1996; Wakefield et al., 2003), 6/19  $FoxO4^{-/-}$  females, generally over 2 years of age, developed this neoplasm compared with 0/11 age-matched  $FoxO4^{+/+}$  (p=0.0613) and 2/15  $FoxO4^{-/+}$  (p=0.2569) females. Since FoxOs have been linked to p27<sup>Kip1</sup> regulation (Medema et al., 2000), we emphasize that these prolactinomas are distinct from the intermediate lobe pituitary adenomas arising in p27<sup>Kip1</sup> and Rb mutant mice (Fero et al., 1996; Hu et al., 1994; Kiyokawa et al., 1996; Mahler et al., 1996; Nakayama et al., 1996; Wakefield et al., 2003). Consistent with a minor tumor suppressor role for FoxO4, treatment with the carcinogen 7,12-dimethylbenz-alpha-anthracene (DMBA) did not reveal significant differences in median survival (23.4 weeks for  $FoxO4^{-/-}$  and 27.3 weeks for  $FoxO4^{+/+}$ , p=0.4926) or in tumor incidence or spectrum, although  $FoxO4^{-/-}$  animals showed a modest increase in lymphoma incidence that approached statistical significance (p=0.053, Fisher Exact Test) (Supplemental Figure S5a and b).

Aged  $FoxO3^{-/-}$  mice are prone to dermatitis between 10-24 months of age and 15/35  $FoxO3^{-/-}$  mice required euthanasia due to progressive skin ulceration (Supplemental Figure S3c and d). The basis of this dermatitis has not been explored. Of the remaining dermatitis-free  $FoxO3^{-/-}$  mice, 19/20 mice developed tumors (Supplemental Figure S4c and d, p=0.0010; Figures S3e and f). While  $FoxO3^{-/-}$  females

show a more rapid onset of tumors, this relates to increased occurrence of ovarian stromal neoplasms (4/16 *FoxO3*<sup>-/-</sup> versus 0/10 *FoxO3*<sup>+/+</sup> females; p=0.1358) and a shorter latency and increased growth of pituitary prolactinomas (7/16 *FoxO3*<sup>-/-</sup> versus 1/10 *FoxO3*<sup>+/+</sup> females; p=0.0989) (Supplemental Figures S4e and f, Table S1) which are likely due to elevated gonadotropins associated with premature ovarian failure (Castrillon et al., 2003) and the predisposition of aged FVB/n females to prolactinomas (Mahler et al., 1996; Wakefield et al., 2003). Finally, *FoxO3* status did not alter the outcome of DMBA exposure studies with respect to overall survival and tumor incidence and spectrum (Supplemental Figures S5c and d), with the exception of angiosarcomas, which had an increased incidence in *FoxO3*<sup>-/+</sup> (p=0.036) and <sup>-/-</sup> (p=0.364) versus <sup>+/+</sup> animals. Thus, *FoxO3* deficiency is associated with a modest tumor phenotype that emerges very late in life and is dominated by neoplasms driven by an abnormal hormonal milieu in females, and a modest increase in the incidence of angiosarcomas but not overall cancer incidence following carcinogen treatment.

To begin to address possible redundancy among FoxO family members, compound germline mutant mice and controls were generated and subjected to detailed long-term phenotypic analyses. *FoxO3*<sup>-/-</sup> *FoxO4*<sup>-/-</sup> mice (n=31), followed for up to 100 weeks of age, did not exhibit new phenotypes, change in overall survival, or exacerbation of physiological anomalies beyond those observed in the *FoxO3*<sup>-/-</sup> mice (e.g., hemolytic anemia, ovarian failure, etc), or increased tumor incidence (Supplemental Figure S6). Lastly, through 80 weeks of observation, *FoxO1*<sup>-/+</sup> *FoxO3*<sup>-/-</sup> *FoxO4*<sup>-/-</sup> mice do not display changes in tumor incidence and spectrum (data not shown). These studies included exhaustive comparisons with *FoxO3*<sup>+/+</sup> *FoxO4*<sup>+/+</sup> and

*FoxO3*<sup>-/+</sup> *FoxO4*<sup>-/-</sup> controls (As noted above, the detailed tumor incidence, spectrum, and overall survival data pertaining to these cohorts are presented in Supplemental Figures S3-S6, and Table S1).

#### **Vascular neoplasms in aging *Mx-Cre*<sup>+</sup> mice of various *FoxO* genotypes.**

Discrete liver hemangiomas and occasional angiosarcomas were seen in aged *Mx-Cre*<sup>+</sup>; *FoxO1*<sup>L/L</sup> (1 mouse (at 85 weeks) of 5 mice that died at 53-100 weeks and 3 of 4 mice examined at 87-104 weeks of age), *Mx-Cre*<sup>+</sup>; *FoxO1/3*<sup>L/L</sup> (7 of 10 mice that died at 50-82 weeks and 2 of 2 mice examined at 90-102 weeks) and *Mx-Cre*<sup>+</sup>; *FoxO1/4*<sup>L/L</sup> mice (5 of 7 mice that died at 58-86 weeks and 2 of 2 mice examined at 96-98 weeks).

#### **Supplemental Methods**

**Targeting constructs.** *FoxO3*<sup>-/-</sup> mice were generated as described (Castrillon et al., 2003). We cloned and mapped the *FoxO1* and *FoxO4* genomic regions encompassing both coding exons from a bacterial artificial chromosome library. The targeting vector pK0II (courtesy Nabeel Bardeesy) carries a negative selection marker for diphtheria toxin (DT), a positive selection marker for neomycin resistance (Neo), Frt sites (white rectangles) and loxP sites (gray triangles). For *FoxO4*, the first coding exon (containing the start codon and encoding the N-terminal half of the full-length protein) was targeted. For *FoxO1*, the second major coding exon (encoding the C-terminal half of the full-length protein) was targeted. We electroporated TC1 embryonic stem cells and selected transfected cells by standard techniques. We screened 96 clones for each of the three loci using a genomic probe external to the targeting construct (Supplemental Figure S1 and S2) to identify recombinants that contained the Neo selection cassette and both loxP sites. Blastocyst injections were carried out and transmitting chimeric mice were bred with EIIa-Cre transgenic (Lakso et al., 1996) mice to generate the null alleles, and with ACT-FlpE mice (courtesy of Susan Dymecki) to generate the conditional/floxed alleles. Each allele was backcrossed three times to FVB/n females

and progeny of these matings that were Cre<sup>-</sup> and Flp<sup>-</sup> were then intercrossed with littermates to generate the experimental cohorts. Mice were genotyped by multiplex PCR (primers and conditions are available on request).

**Generation of mice for aging and tumorigenesis studies.** Due to the location of *FoxO4* on the X chromosome, it is not possible to generate *FoxO4*<sup>-/+</sup> males or littermate *FoxO4*<sup>+/+</sup> and <sup>-/-</sup> females. Otherwise, all experimental and control animals were matched littermates. For the Mx-Cre studies, an *Mx-Cre*<sup>+</sup> male (courtesy of Klaus Rajewsky) was mated with a *FoxO1*<sup>L/L</sup>; *FoxO3*<sup>L/L</sup>; *FoxO4*<sup>L/L</sup> (*FoxO1/3/4*<sup>L/L</sup>) female, and the progeny were then crossed with *FoxO1/3/4*<sup>L/L</sup> mice. The resulting offspring were intercrossed to generate mice of the desired genotypes. Litters were treated starting at 4-5 weeks with 3 intraperitoneal injections every other day of 300 µg of polyinosine-polycytidylic acid (pI-pC), a synthetic analog of double-stranded RNA (Invivogen), to induce expression of interferon-beta, thereby leading to transient activation of *Mx-Cre*.

**Whole animal and tumor analysis.** Littermate controls were analyzed for tumor-free survival. Animals were genotyped by PCR and allowed to age undisturbed in a maximum of 5 mice per cage with standard chow and water *ad libitum* in a standard light-day cycle. Mice were monitored three times a week and were sacrificed when moribund or if external tumors exceeded 2 cm in diameter and scored as a death in survival analysis. Those animals with cancer, as determined by histological analysis, were scored as an event in the tumor-free survival Kaplan–Meier analysis. For lung tumors, analysis of tumor load was carried out as done previously (Zhang et al., 2001).

**DMBA treatment.** Seven-day old pups were treated with 5% 7,12-dimethylbenz-alpha-anthracene (DMBA) in acetone by pipetting 50µl onto the back, and allowing it to air-dry. Mice were monitored three times a week for signs of morbidity and underwent full autopsies for tumor detection.

**Analysis of *Rosa26-lacZ* reporter mice.** B6, 129-GtRosa26<sup>tm1Sor</sup> mice (no. 3309, Jackson Laboratory, Bar Harbor, ME) were used as a reporter strain. Organs were harvested from an *Mx-Cre*<sup>+</sup>; *Rosa26-lacZ*<sup>+</sup> female and an *Mx-Cre*<sup>-</sup>; *Rosa26-lacZ*<sup>+</sup> female (both injected with pI-pC) and cut into 1-2 mm pieces. After fixation with 4% paraformaldehyde + 0.25% glutaraldehyde in PBS for 2 hours, tissues were stained for 24 hours in the dark and postfixed in formalin. Tissues were embedded in paraffin and sections were stained with Nuclear Fast Red or left unstained.

**Isolation and characterization of endothelial cells (ECs).** Livers of *Mx-Cre*<sup>+</sup> or *Mx-Cre*<sup>-</sup> mice injected with pI-pC 3 weeks prior were used for the isolation of liver ECs. Liver tissues were homogenized and digested in collagenase D and lysates were run through a cell strainer. ECs were enriched by taking the interphase of a 30% Histodenz (Sigma) and RPMI suspension of cells overlaid after spinning at 1500xg for 20min. Cells were further affinity isolated by CD31-M450 prebound magnetic beads. Isolation of lung ECs and Matrigel morphogenesis assays were carried out as previously described (Balconi et al., 2000) and cells were grown on dishes coated with bovine fibronectin (Sigma). VEGF and basic FGF were obtained from the Biological Resources Branch, NCI Preclinical Repository. Cells were grown in DMEM + 0.5% BSA supplemented with 100 ng/ml VEGF, 100 ng/ml FGF, or 10% FBS. EC proliferation and apoptosis were measured with the BrdU labelling and detection kit (Roche) and the In situ cell death detection kit (Roche), respectively per the manufacturer's instruction. Viability of cells after various treatments was measured by MTT (2,3-bis-(2-methoxy-4-nitro-5-sulphophenyl)-2H-tetrazolium-5-carboxanilide) assays in 96 well plates. Knockdown of mouse Sprouty2 was performed by transfection using FuGENE6 (Roche) of shRNA constructs provided by Dr. William Hahn, Dana Farber Cancer Institute. The shRNA constructs shSpry2\_1 and \_2 correspond to clone ID#s TRCN0000007521 and 7523, respectively (The DFCI-Broad RNAi Consortium, commercially available from Sigma-Aldrich). Vector (pLKO) alone and pLKO-GFP

were used as controls to exclude non-specific responses. Cells were selected for 96 hrs with puromycin (1 µg/ml) and used for further assays. Additional shRNAs used are listed below.

**Microarray analysis.** Freshly isolated lung ECs and liver ECs were grown on fibronectin-coated plates for 72 hours. RNA was isolated using Trizol (Invitrogen) and the RNeasy mini kit (Qiagen). Gene expression profiling was performed utilizing the Affymetrix 430 2.0 chips. dChip (Li and Wong, 2001; Li and Wong, 2003) was used to normalize arrays and to compute expression indices. The log transformed expression indices  $x_{ijk}$  ( $i$ -gene,  $j$ -condition,  $k$ -replicate) were modeled using a hierarchical empirical Bayes model which assumes (i)  $x_{ijk} | \mu_{ij}, \sigma_i^2 \sim N(\mu_{ij}, \sigma_i^2)$ ; (ii)  $\mu_{ij} | \mu_0, \tau_0^2 \propto 1$ ; and (iii)  $\sigma_i^2 | \nu_0, \omega_0^2 \sim Inv - \chi^2(\nu_0, \omega_0^2)$ . To select genes, we first estimated the posterior mean of  $\sigma_i^2$  for each gene using a variance shrinkage estimator (Ji and Wong, 2005),  $\sigma_i^2$  was then set to its estimate  $\hat{\sigma}_i^2$  and fixed. For comparisons between two conditions (e.g., Mx-Cre<sup>+</sup> Lung vs. Mx-Cre<sup>-</sup> Lung),  $t_i = (\bar{x}_{i1} - \bar{x}_{i2}) / (\hat{\sigma}_i \sqrt{1/K_1 + 1/K_2})$  ( $K_j$ - the number of arrays within condition  $j$ ) were used to rank genes. For comparisons among three or more conditions (e.g., “[Mx-Cre<sup>+</sup> liver EC > Mx-Cre<sup>-</sup> liver EC] and [Mx-Cre<sup>+</sup> Lung > Mx-Cre<sup>-</sup> Lung]”), random samples  $\mu_{ij}$  were drawn from  $N(\bar{x}_{ij}, \hat{\sigma}_i^2 / K_j)$ . The empirical frequencies that the pre-specified criterion was satisfied among 1000 Monte Carlo draws were then used to rank genes, and for each gene, one minus the empirical frequency was reported as its score.

**FoxO DNA Binding Element Studies.** Differentially expressed genes with RefSeq annotations were analyzed for the presence of FoxO BE. The March 2005 version of mouse genome (NCBI build 34) was used in the analysis. A 3<sup>rd</sup> order Markov chain was used to model the random background sequence. The FoxO matrix was used to scan the target regions. At each position, its likelihood was compared with the likelihood of the background model. A site was picked as a potential FoxO binding site

if the likelihood ratio between the FoxO and background model is greater than 250. Potential FoxO binding sites were filtered further by cross-species conservation using two independent approaches. In the first approach (Method1), a conservation score was computed for each position in the genome. FoxO sites whose mean conservation score was among the top 10% of the genome-wide scores were preserved as the conserved FoxO binding sites. To compute the conservation score, multiple alignments between mouse and 9 vertebrate genomes were downloaded from UCSC genome browser (<http://genomes.ucsc.edu>). A 50bp sliding window was used to scan the alignment. For each window, we counted matched base pairs between species  $i$  and  $j$  (denoted by  $I_{ij}$ ,  $i$  = mouse;  $j$  = human, rat, dog, cow, or zebrafish), and the total number of columns in the pairwise alignment (denoted by  $N_{ij}$ ). We computed percent identities  $\hat{\theta}_{ij} = I_{ij}/N_{ij}$ , and derived corresponding z-scores  $z_{ij} = (\hat{\theta}_{ij} - \theta_{ij})/\sqrt{\theta_{ij}(1 - \theta_{ij})/N_{ij}}$ , where  $\theta_{ij}$  was the percent identity between species  $i$  and  $j$  in a 1Mbp surrounding window. The z-scores from five pairwise comparisons (mouse-human, mouse-dog, mouse-cow mouse-chicken, and mouse-zebrafish) were then averaged and converted into the interval [0, 255] to serve as the final conservation score. The higher the score, the more conserved a position was. For each gene, the total number of conserved FoxO sites was shown in Tables 1 and 2, and  $\text{Log}_{10}$  (likelihood ratio between the FoxO matrix model and background Markov model) of all conserved FoxO sites were added up and the sum shown.

In the second approach (Method2), we selected ortholog genes from human, dog, cow, chicken, and zebrafish for each mouse gene in the gene list. MLAGAN (Brudno et al., 2003) was used to construct the cross-species alignment of target regions. The FoxO matrix was used to scan each species to get potential FoxO binding sites. If a position in the alignment was identified as FoxO binding site in mouse, human and at least one additional species, it was identified as a 3-species conserved FoxO site.



**Chromatin Immunoprecipitation (ChIP) assay.** Two million liver ECs were crosslinked by addition of 1% formaldehyde to the medium for 10 min followed by quenching with 125mM glycine. The cells were resuspended in lysis buffer (1% SDS, 10 mM EDTA, and 50 mM Tris (pH 8.1), Protease Inhibitor Cocktail II (Roche)), sonicated 10 times for 30 s with 2 min idle time, the lysates were cleared by centrifugation. One hundred microliters of the sheared DNA was diluted 10-fold in dilution buffer (0.01% SDS, 1.1% Triton X-100, 1.2 mM EDTA, 16.7 mM Tris-HCl (pH 8.1), and 167 mM NaCl). Chromatin solution was precleared for 1 h at 4°C with 60 µl of protein G-agarose/salmon sperm DNA. Ten microliters of the precleared chromatin solutions was saved for assessment of input chromatin, and the rest of the precleared chromatin solutions was incubated with 1 µg of anti-RNA polymerase II (clone CTD4H8, Upstate) or mixture of anti-FoxO Ab [Afx (FoxO4), FKHR (FoxO1), Cell signalling, FKHL1(FoxO3), Upstate) overnight at 4°C. Immune complexes were collected on 60 µl of protein A/G Plus-agarose/salmon sperm beads. Precipitates were washed sequentially for 5 min each in Low salt wash buffer [0.1% SDS, 1% Triton X-100, 2 mM EDTA, 20 mM Tris-HCl (pH 8.1), 150 mM NaCl], High salt wash buffer [0.1% SDS, 1% Triton X-100, 2 mM EDTA, 20 mM Tris-HCl (pH 8.1), 500 mM NaCl], LiCl immune wash buffer (Upstate). Precipitates were then washed twice with 1X TE (pH. 8.0) and extracted two times with 1% SDS, 0.1 M NaHCO<sub>3</sub>. Elutes were incubated at 65°C with 0.25 M NaCl overnight to reverse cross-linking followed by another 1 hr incubation at 45°C with 10 µM EDTA, 40 µM Tris-HCl (pH 6.8) and 2µg Proteinase K (Sigma). The DNA was purified using a PCR purification kit (Qiagen) with 40 µl of distilled water. Two microliters of immunoprecipitated DNA was used for real time

PCR analysis in 25- $\mu$ l total reaction volumes, and the following primers were used in the ChIP assays:

| Primers | forward                 | reverse               |
|---------|-------------------------|-----------------------|
| spry_a  | catttggtgttttggggagagat | cggcagttgggttgaatta   |
| spry_b  | tagggcgactcagtgctatc    | gaccggagtcaaaggaccttc |
| spry_c  | aattagcaaatggctcccg     | tttgactgtgcatgaagc    |
| spry_d  | ttcagtcctccaagcaatctag  | agtgcctccaggaagggaat  |

| primers  | forward              | reverse              |
|----------|----------------------|----------------------|
| ADM_a    | ttgttgctgtcaaggtttt  | cgctctcaccttacacaca  |
| ADM_b    | gattggagggttcgtctga  | aaaactcagctgcctgtgtg |
| CITED_c  | taattgccttgcggagctt  | ggagcactcaccttggttt  |
| CITED_d  | ggtcgctttaggcagagaaa | ggaagcaagaccacagaagg |
| CITED_e  | ttcagtgactggcttaaa   | taggtgggtctcatgtgctg |
| CTGF_f   | acgagcctgcaagctattg  | acgatgttgttgggtttgt  |
| CCRN4L_g | ggcttgtagcattgtgaaa  | gaggggaagtaccagtgtca |
| CCRN4L_h | ttcaagaaaggaaccgaaaa | agtgcgctttgtttgtttg  |
| BMPER_i  | aggcatctagccatggtgtt | gcttagcatgctccatttc  |
| BMPER_j  | tttcaggcaggtgaagacc  | tgaagcgcaatctcttct   |
| MRC1_k   | tgttctctctcccctct    | ggagctgcctgactgaaaag |
| PBX1_l   | agccttcatgggctttgat  | ggttaccagggtggtgcta  |
| PBX1_m   | ctcacgggtgtctttgacct | ttgttaggggtcctgtttg  |

PCR conditions were as follows: 30 cycles of 94°C for 30s, 55°C for 30s, and 72°C for 30s. Twenty microliters of PCR products were analyzed by 2% TBE agarose gel containing ethidium bromide.

**RNA *in situ* hybridization (RISH).** Tissues were fixed in 4% paraformaldehyde overnight, frozen in OCT and cryosectioned (10 micron-thick sections). ISH was performed as previously described (Gray et al. 2004). Full length cDNA was used to generate probes. FoxO1, 3, and 4 cDNAs were PCR cloned into pCRII vector and in vitro transcribed. TCF4, KLF6, MEIS1, and PBX1 cDNAs were generously provided by Dr. Qiufu Ma; the remaining cDNAs were purchased from a commercial source (Open Biosystems).

**ShRNAs used for knockdown studies.** All the shRNAs were acquired through TRC. Clone and source ID are as below.

| sourceId | symbol | cloneId        | cloneName            |
|----------|--------|----------------|----------------------|
| 18514    | Pbx1   | TRCN0000012573 | NM_008783.1-2445s1c1 |
| 18514    | Pbx1   | TRCN0000012574 | NM_008783.1-1478s1c1 |
| 18514    | Pbx1   | TRCN0000012577 | NM_008783.1-1036s1c1 |
| 12443    | Ccnd1  | TRCN0000026883 | NM_007631.1-608s1c1  |
| 12443    | Ccnd1  | TRCN0000026951 | NM_007631.1-254s1c1  |
| 12443    | Ccnd1  | TRCN0000026948 | NM_007631.1-706s1c1  |
| 12443    | Ccnd1  | TRCN0000026881 | NM_007631.1-511s1c1  |
| 12443    | Ccnd1  | TRCN0000026910 | NM_007631.1-879s1c1  |
| 17533    | Mrc1   | TRCN0000054795 | NM_008625.1-4070s1c1 |
| 17533    | Mrc1   | TRCN0000054796 | NM_008625.1-1351s1c1 |
| 17533    | Mrc1   | TRCN0000054797 | NM_008625.1-2687s1c1 |
| 15901    | Id1    | TRCN0000071433 | NM_010495.1-331s1c1  |
| 15901    | Id1    | TRCN0000071435 | NM_010495.1-476s1c1  |
| 15901    | Id1    | TRCN0000071437 | NM_010495.1-103s1c1  |
| 21807    | TSC22D | TRCN0000086178 | NM_009366.1-251s1c1  |
| 21807    | TSC22D | TRCN0000086179 | NM_009366.1-418s1c1  |
| 21807    | TSC22D | TRCN0000086180 | NM_009366.1-290s1c1  |
| 21807    | TSC22D | TRCN0000086181 | NM_009366.1-227s1c1  |
| 21807    | TSC22D | TRCN0000086182 | NM_009366.1-409s1c1  |
| 11535    | Adm    | TRCN0000098030 | NM_009627.1-979s1c1  |
| 11535    | Adm    | TRCN0000098031 | NM_009627.1-259s1c1  |
| 11535    | Adm    | TRCN0000098032 | NM_009627.1-434s1c1  |
| 11535    | Adm    | TRCN0000098034 | NM_009627.1-530s1c1  |
| 73230    | Bmper  | TRCN0000114776 | NM_028472.1-3282s1c1 |
| 73230    | Bmper  | TRCN0000114777 | NM_028472.1-2525s1c1 |
| 73230    | Bmper  | TRCN0000114778 | NM_028472.1-867s1c1  |
| 73230    | Bmper  | TRCN0000114779 | NM_028472.1-1105s1c1 |
| 73230    | Bmper  | TRCN0000114780 | NM_028472.1-2277s1c1 |
| 12457    | Cern4l | TRCN0000099675 | NM_009834.1-2115s1c1 |
| 12457    | Cern4l | TRCN0000099676 | NM_009834.1-1389s1c1 |
| 12457    | Cern4l | TRCN0000099677 | NM_009834.1-1636s1c1 |
| 12457    | Cern4l | TRCN0000099678 | NM_009834.1-1642s1c1 |
| 12457    | Cern4l | TRCN0000099679 | NM_009834.1-1333s1c1 |
| 14219    | Ctgf   | TRCN0000109665 | NM_010217.1-2079s1c1 |
| 14219    | Ctgf   | TRCN0000109666 | NM_010217.1-572s1c1  |
| 14219    | Ctgf   | TRCN0000109667 | NM_010217.1-1239s1c1 |
| 14219    | Ctgf   | TRCN0000109668 | NM_010217.1-789s1c1  |
| 14219    | Ctgf   | TRCN0000109669 | NM_010217.1-1041s1c1 |

## Supplemental Figure Legends

### Supplemental Figure S1: Generation of *FoxO1* conditional and null alleles. **a**,

Schematic of *FoxO1* targeting vector. LoxP sites were inserted into intronic sites flanking the second exon of *FoxO1*. PCR primers are indicated with arrows. **b**, Southern analysis of DNA from ES clones to demonstrate recombination. DNA was digested with HindIII+ SspI (left panel) and SpeI (right panel). **c**, PCR genotyping of wild type, floxed, and null alleles using primers a + b + d. **d**, Confirmation of *FoxO1* deletion and loss of expression in *FoxO1* null MEFs by Northern analysis.

### Supplemental Figure S2: Generation of *FoxO4* conditional and null alleles. **a**,

Schematic of *FoxO4* targeting vector. LoxP sites were inserted into intronic sites flanking the first exon of *FoxO4*. PCR primers are indicated with arrows. **b**, Southern analysis of DNA from ES clones to demonstrate recombination. DNA was digested with XhoI + NcoI. **c**, PCR genotyping of wild type, floxed, and null alleles using primers d + e + m. **d**, Confirmation of *FoxO4* deletion and loss of expression in *FoxO4*<sup>-/-</sup> skeletal muscle by Northern analysis.

### Supplemental Figure S3: Analysis of FoxO germline knockouts. **a**, Overall survival

of *FoxO1*<sup>-/+</sup> mice. **b**, Overall survival of *FoxO4*<sup>-/-</sup> mice. **c**, Overall survival of *FoxO3*<sup>-/-</sup> mice. **d**, Overall survival of *FoxO3*<sup>-/-</sup> mice with dermatitis. For d-f, *FoxO3*<sup>-/-</sup> mice are divided into two groups: those sacrificed due to dermatitis, and those without dermatitis-associated morbidity. **e**, Tumor-free survival of *FoxO3*<sup>-/-</sup> males. **f**, Tumor-free survival of *FoxO3*<sup>-/-</sup> females. **g**, Lung tumor load (total tumor volume) in *FoxO4*<sup>+/+</sup> (n=8) and *FoxO4*<sup>-/-</sup> (n=15) mice. **h**, Histology of *FoxO4*<sup>-/-</sup> lung tumors, hematoxylin and eosin stains. Scale bars: 500 μm (low magnification) and 100 μm (high power).

### Supplemental Figure S4: Tumor-free survival of single and compound (germline)

**FoxO** mutant mice. **a**, *FoxO1*. **b**, *FoxO4*. **c**, *FoxO3*. **d**, *FoxO3* with exclusion of

dermatitis-associated deaths. **e**, Pituitary adenomas in *FoxO3* females. Left to right: normal pituitary (*FoxO3*<sup>+/+</sup>), small pituitary adenoma (*FoxO3*<sup>+/+</sup>), and large pituitary adenoma (*FoxO3*<sup>-/-</sup>). Black dashed lines demarcate pituitary gland; white dashed lines demarcate pituitary adenomas. **f**, Pituitary tumor histology, hematoxylin and eosin stain. Adenoma shows monomorphic cell population. Scale bar: 100  $\mu$ m.

**Supplemental Figure S5: Analysis of DMBA-treated FoxO germline knockouts. a**, Survival of DMBA-treated *FoxO4*<sup>-/-</sup> mice. Pups were treated with DMBA at day 7. Mice underwent full autopsies and histopathologic analysis. **b**, Tumor development in DMBA-treated *FoxO4*<sup>-/-</sup> mice. Total numbers of each genotype are indicated. For the incidence of angiosarcomas in the uterus, percentages were calculated from total number of females only. **c**, Survival of DMBA-treated *FoxO3*<sup>-/-</sup> mice. **d**, Tumor development in DMBA-treated *FoxO3*<sup>-/-</sup> mice.

**Supplemental Figure S6: Analysis of compound FoxO3/FoxO4 germline knockouts. a**, Overall survival of *FoxO4*<sup>-/-</sup>; *FoxO3*<sup>-/-</sup> and *FoxO4*<sup>-/-</sup>; *FoxO3*<sup>+/-</sup> littermates and *FoxO4*<sup>+/+</sup>; *FoxO3*<sup>+/+</sup> control mice. Survival of *FoxO3*<sup>-/-</sup> mice is plotted for comparison. **b**, Tumor-free survival of compound *FoxO4*<sup>-/-</sup>; *FoxO3*<sup>-/-</sup> mice. **c**, Tumor spectra of mice with compound germline *FoxO* mutations. *FoxO4*<sup>-/-</sup>; *FoxO3*<sup>-/-</sup> mice (n=31) were analyzed in relation to *FoxO4*<sup>-/-</sup>; *FoxO3*<sup>+/-</sup> (n=26) littermates and *FoxO4*<sup>+/+</sup>; *FoxO3*<sup>+/+</sup> mice (n=28).

**Supplemental Figure S7: Abnormal vascular lesions in Mx-Cre<sup>+</sup> mice and intermediate controls. a-d**, hematoxylin and eosin-stained tissue sections. **a**, *Mx-Cre*<sup>+</sup> mice (20-43 weeks). i, adrenal gland (medulla replaced by hemorrhage, \*=region of hemorrhage; scale bar=400  $\mu$ m), ii, Hemangiomatous change in liver (scale bar=200  $\mu$ m), iii, bone marrow (left: bone marrow from *Mx-Cre*<sup>-</sup> mouse; right: bone marrow from *Mx-Cre*<sup>+</sup> mouse; scale bar=100  $\mu$ m), iv, skin (scale bar=200  $\mu$ m), v, perirenal fat hemangioma, (scale bar=200  $\mu$ m), vi, hemorrhagic lymph node (scale bar=500  $\mu$ m). **b**,

Uterine horn from 60-week *Mx-Cre<sup>+</sup>;FoxO1<sup>L/L</sup>*. **i**, low power (scale bar=2 mm), **ii**, high power of boxed region from (i) (scale bar=500  $\mu$ m). **c**, Uterine horn and perirenal fat hemangioma from 60-week *Mx-Cre<sup>+</sup>;FoxO1/4<sup>L/L</sup>* mouse. **i**, uterine horn, low power (scale bar=2 mm); **ii**, uterine horn, high power (scale bar=500  $\mu$ m); **iii**, perirenal fat hemangioma (scale bar=200  $\mu$ m). **d**, *Mx-Cre<sup>+</sup>;FoxO1/3<sup>L/L</sup>* mouse (50 weeks). Depicted are: uterine horn (low (i) and high (ii) power), adipose tissue (iii), and skin (iv). Scale bars: 500  $\mu$ m, (i), 50  $\mu$ m (ii), 200  $\mu$ m (iii and iv).

**Supplemental Figure S8. *Mx-Cre* transgene results in broad Cre-mediated recombination in endothelium and most epithelia following pI-pC treatment.**

**a**, *Rosa26-lacZ* reporter mice 6 months after pI-pC treatment. **a**, Liver (inset=control liver). **b**, Thymus. **c**, Lung. Liver, thymus, and lung parenchymal cells show very high levels of recombination. **d**, Pancreas. **e**, Salivary gland (submandibular). Both pancreas and salivary gland showed high levels of recombination in ductal epithelium, and a low frequency of recombination in acinar cells. **f**, Mammary gland with essentially complete recombination. **g**, Skin. **h**, Small intestine. Skin and small intestine epithelial cells exhibited subtotal recombination; distinct clones of positive cells were observed. **i**, Renal tubules. **j**, Brain. **k**, Abdominal muscle. Brain and skeletal muscle exhibited a very low frequency of recombination, except for endothelial cells where recombination frequencies approached 100%, as was the case in other tissues. The blue staining surrounding myofibers corresponds to capillary endothelium. **l**, uterus with high frequency of recombination in endothelial cells and in some myometrial cells, particularly those of the outer layer (bottom edge of figure). Scale bar = 120  $\mu$ m (d, e); 60  $\mu$ m (a, f, g, h, i, k); 40  $\mu$ m (b, c, j, l). **b**, Quantitative real-time PCR analysis of FoxO deletion in *Mx-Cre<sup>+</sup>* mice. Tissues were harvested from 2-3 sets each of *Mx-Cre<sup>+</sup>* and *Mx-Cre<sup>-</sup>* mice and RNA was isolated and analyzed for *FoxO1*, *FoxO3*, or *FoxO4* expression.

**Supplemental Figure S9. Characterization of isolated ECs.** At 96hr post isolation both lung and liver EC are CD31+ above 97% by flowcytometry analysis (a) and immunofluorescence for CD31 and VE-cadherin shown in red (b). **b.** right panels, mixed cells from a mouse lung were used as specificity controls (blue, DAPI). Arrows indicate lung EC stained positive for CD31 or VE-cadherin within the same microscopic field with non-EC. **c.** comparable deletions of FoxO1,3,4 in both lung and liver EC were examined by immunoblotting (c) and PCR analysis (d). Note comparable expression of FoxO in liver and lung EC. FoxO4 protein is normally detected by FoxO1 antibody and is under the detection limit in EC.

**Supplemental Figure S10. *In situ* hybridization for FoxO1/3/4.** 3 weeks after pI-pC injection lung, uterus, and liver tissues were harvested from *Mx-Cre<sup>-</sup>* and *Mx-Cre<sup>+</sup>;FoxO1/3/4<sup>L/L</sup>* mouse and examined for FoxO mRNA expression by RISH.

**Supplemental Figure S11. *In situ* hybridization for FoxO target genes.** RISH was performed for predicted FoxO targets genes as in Supplemental Figure S10. Note differential expression of indicated genes in the vascular endothelium.

**Supplemental Figure S12. ChIP analysis for FoxO target genes.** FoxO BE conserved in more than 3 species was tested for FoxO binding by ChIP analysis. Summary of FoxO BE coordinates and results are presented in the table (left). Indicated PCR products from 25-35 cycles were run on 1.5% agarose gel with EtBr and inverted images were taken with imager.

**Supplemental Figure S13. Effect on EC viability by knockdown of other FoxO target genes.** Expression of randomly chosen FoxO target genes was suppressed by combined shRNAs for each gene in pLKO-lentiviral vectors. Efficiency of knockdown was measured by RT-qPCR (a). Note genes upregulated in *Mx-Cre<sup>+</sup>* liver EC were knocked down to 30~40% and expression of those downregulated were knocked down to 40~50% level in *Mx-Cre<sup>-</sup>* liver EC in order to simulate their FoxO-dependent expression pattern. Effect of knockdown on EC viability was measured by BrdU incorporation (b) and TUNEL assay (c). \*, p<0.05.

**Supplemental Tables**



**Supplemental Table S1. Tumor spectra of mice with germline mutation of a single *FoxO* gene.** For pituitary adenomas and female-specific tumors, mice are separated by gender for analysis of incidence.

**Supplemental Table S2.** List of top 600 differentially expressed genes (~300 up or down) from *Mx-Cre*<sup>+</sup> and *Mx-Cre*<sup>-</sup> thymocytes. 354 most differentially regulated genes used for FoxO BE study were highlighted.

**Supplemental Table S3.** List of top 600 genes (~300 up or down) showing greater fold changes in liver EC from *Mx-Cre*<sup>+</sup> and *Mx-Cre*<sup>-</sup> compared to no significant changes in lung EC. 138 most differentially regulated genes used for FoxO BE study were highlighted.

## References

- Balconi, G., Spagnuolo, R., and Dejana, E. (2000). Development of endothelial cell lines from embryonic stem cells: A tool for studying genetically manipulated endothelial cells in vitro. *Arterioscler Thromb Vasc Biol* 20, 1443-1451.
- Brudno, M., Do, C.B., Cooper, G.M., Kim, M.F., Davydov, E., Green, E.D., Sidow, A., and Batzoglou, S. (2003). LAGAN and Multi-LAGAN: efficient tools for large-scale multiple alignment of genomic DNA. *Genome Res* 13, 721-731.
- Castrillon, D.H., Miao, L., Kollipara, R., Horner, J.W., and DePinho, R.A. (2003). Suppression of ovarian follicle activation in mice by the transcription factor Foxo3a. *Science* 301, 215-218.
- Fero, M.L., Rivkin, M., Tasch, M., Porter, P., Carow, C.E., Firpo, E., Polyak, K., Tsai, L.H., Broudy, V., Perlmutter, R.M., *et al.* (1996). A syndrome of multiorgan hyperplasia with features of gigantism, tumorigenesis, and female sterility in p27(Kip1)-deficient mice. *Cell* 85, 733-744.
- Furuyama, T., Kitayama, K., Shimoda, Y., Ogawa, M., Sone, K., Yoshida-Araki, K., Hisatsune, H., Nishikawa, S., Nakayama, K., Ikeda, K., *et al.* (2004). Abnormal angiogenesis in Foxo1 (Fkhr)-deficient mice. *The Journal of biological chemistry* 279, 34741-34749.
- Hosaka, T., Biggs, W.H., 3rd, Tieu, D., Boyer, A.D., Varki, N.M., Cavenee, W.K., and Arden, K.C. (2004). Disruption of forkhead transcription factor (FOXO) family members in mice reveals their functional diversification. *Proc Natl Acad Sci U S A* 101, 2975-2980.
- Hu, N., Gutschmann, A., Herbert, D.C., Bradley, A., Lee, W.H., and Lee, E.Y. (1994). Heterozygous Rb-1 delta 20/+mice are predisposed to tumors of the pituitary gland with a nearly complete penetrance. *Oncogene* 9, 1021-1027.
- Ji, H., and Wong, W.H. (2005). TileMap: create chromosomal map of tiling array hybridizations. *Bioinformatics* 21, 3629-3636.
- Kiyokawa, H., Kineman, R.D., Manova-Todorova, K.O., Soares, V.C., Hoffman, E.S., Ono, M., Khanam, D., Hayday, A.C., Frohman, L.A., and Koff, A. (1996). Enhanced growth of mice lacking the cyclin-dependent kinase inhibitor function of p27(Kip1). *Cell* 85, 721-732.
- Kuhn, R., Schwenk, F., Aguet, M., and Rajewsky, K. (1995). Inducible gene targeting in mice. *Science* 269, 1427-1429.
- Lakso, M., Pichel, J.G., Gorman, J.R., Sauer, B., Okamoto, Y., Lee, E., Alt, F.W., and Westphal, H. (1996). Efficient in vivo manipulation of mouse genomic sequences at the zygote stage. *Proc Natl Acad Sci U S A* 93, 5860-5865.
- Li, C., and Wong, W.H. (2001). Model-based analysis of oligonucleotide arrays: expression index computation and outlier detection. *Proc Natl Acad Sci U S A* 98, 31-36.
- Li, C., and Wong, W.H. (2003). DNA-Chip Analyzer (dChip). In *The analysis of gene expression data: methods and software*, G. Parmigiani, G. E.S., R. Irizarry, and S.L. Zeger, eds. (Springer).
- Mahler, J.F., Stokes, W., Mann, P.C., Takaoka, M., and Maronpot, R.R. (1996). Spontaneous lesions in aging FVB/N mice. *Toxicol Pathol* 24, 710-716.
- Medema, R.H., Kops, G.J., Bos, J.L., and Burgering, B.M. (2000). AFX-like Forkhead transcription factors mediate cell-cycle regulation by Ras and PKB through p27kip1. *Nature* 404, 782-787.

- Nakayama, K., Ishida, N., Shirane, M., Inomata, A., Inoue, T., Shishido, N., Horii, I., and Loh, D.Y. (1996). Mice lacking p27(Kip1) display increased body size, multiple organ hyperplasia, retinal dysplasia, and pituitary tumors. *Cell* 85, 707-720.
- Wakefield, L.M., Thordarson, G., Nieto, A.I., Shyamala, G., Galvez, J.J., Anver, M.R., and Cardiff, R.D. (2003). Spontaneous pituitary abnormalities and mammary hyperplasia in FVB/NCr mice: implications for mouse modeling. *Comp Med* 53, 424-432.
- Zhang, Z., Wang, Y., Vikis, H.G., Johnson, L., Liu, G., Li, J., Anderson, M.W., Sills, R.C., Hong, H.L., Devereux, T.R., *et al.* (2001). Wildtype Kras2 can inhibit lung carcinogenesis in mice. *Nat Genet* 29, 25-33.

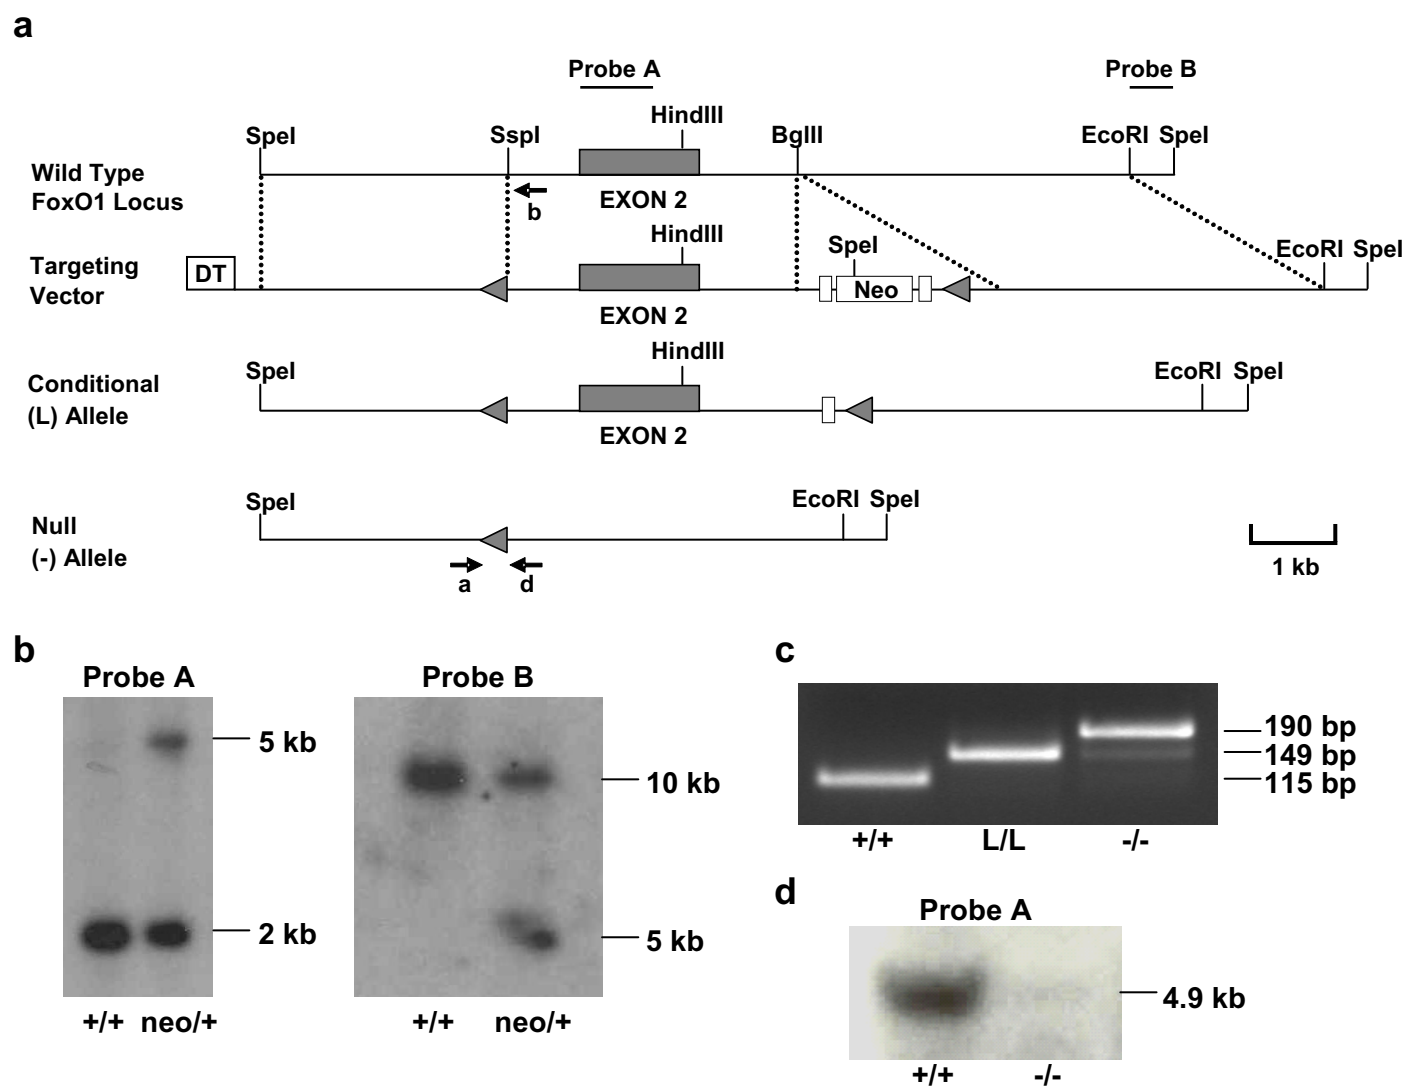

Figure S1.

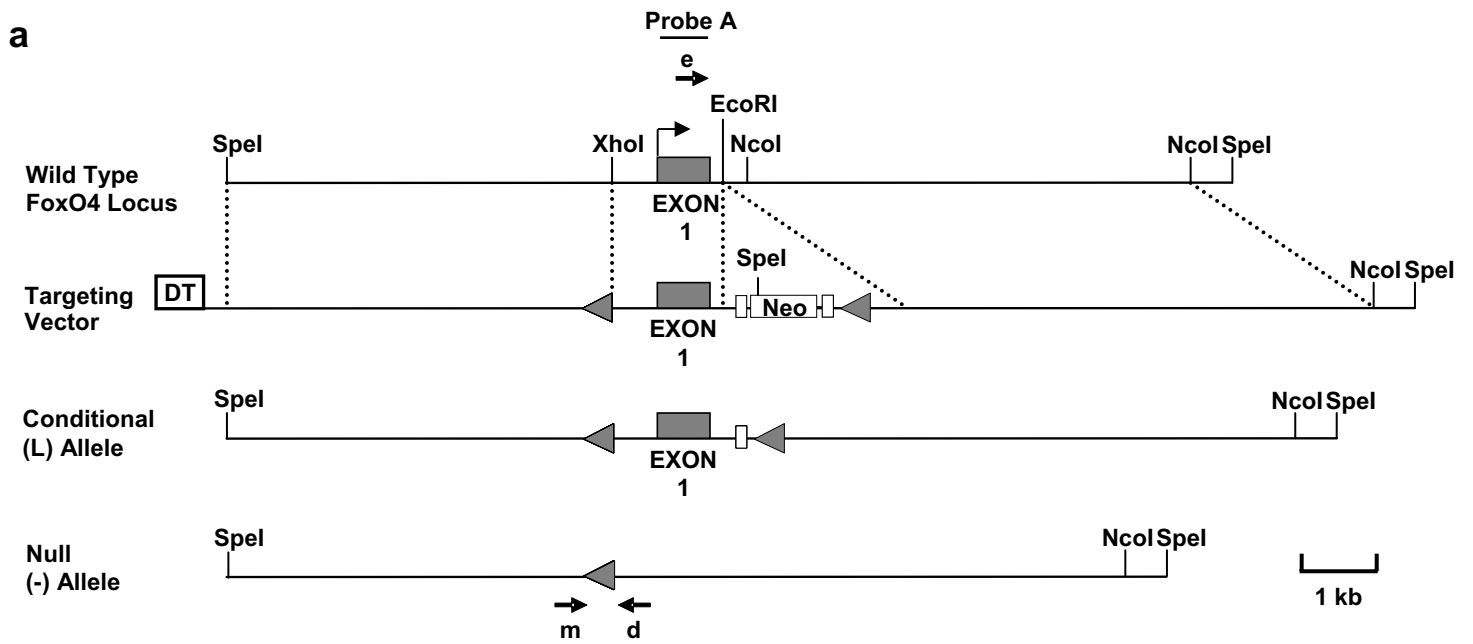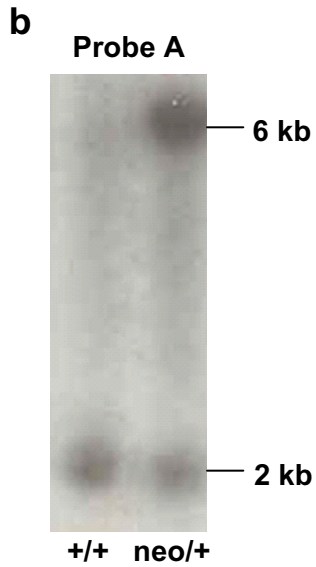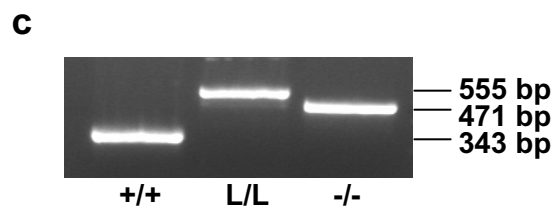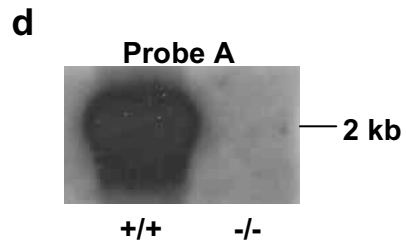

Figure S2.

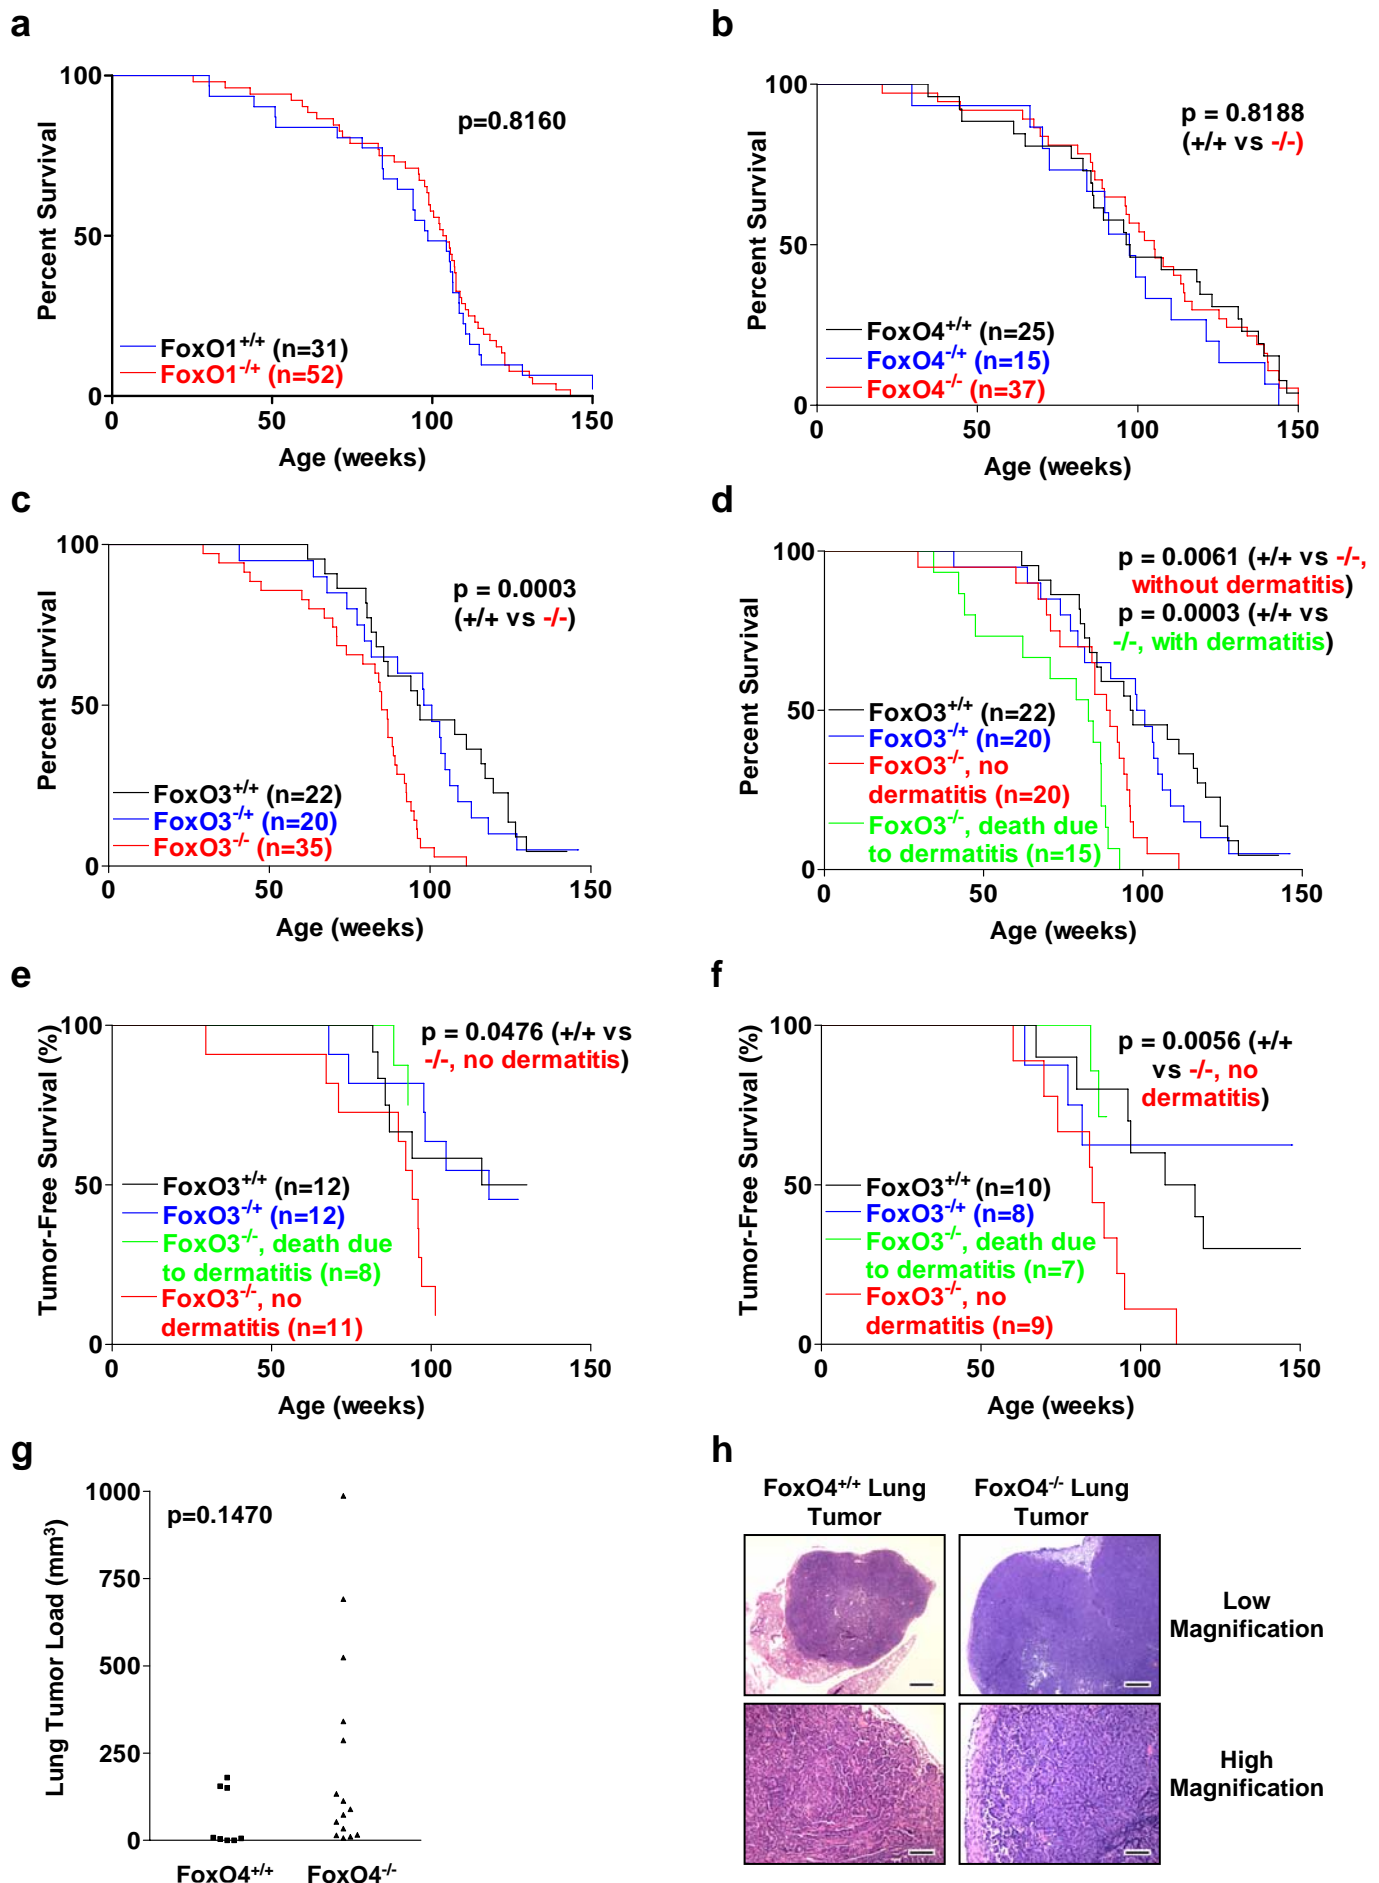

Figure S3.

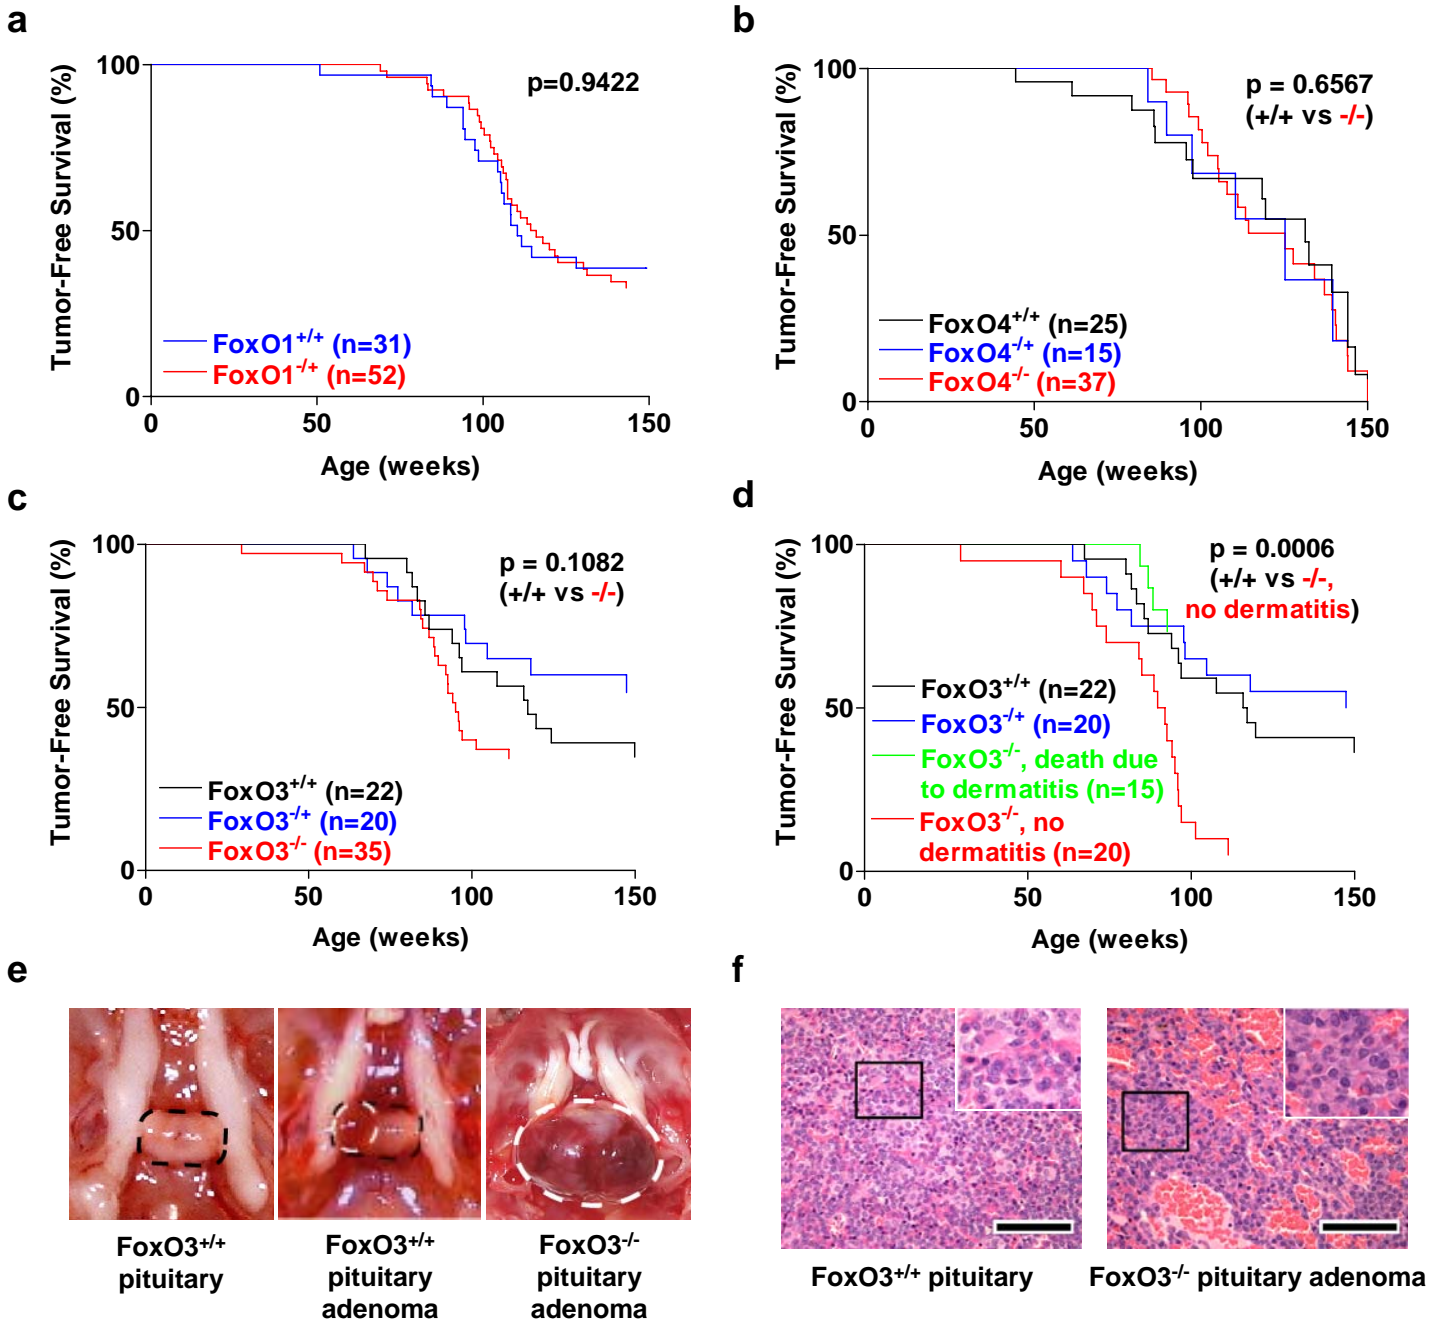

Figure S4.

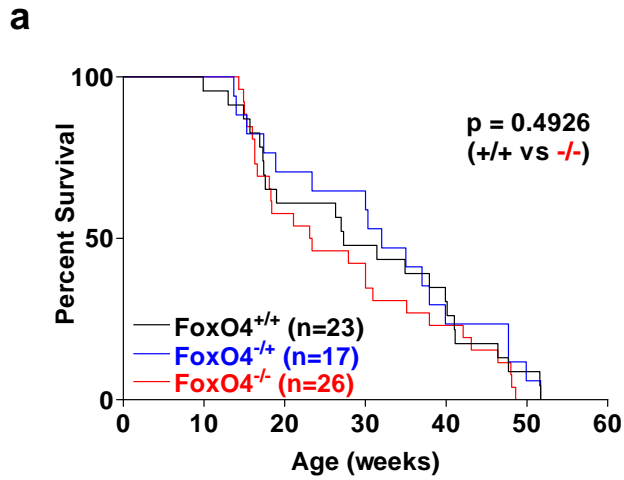

**b**

| Tumor Type                       | FoxO4 <sup>+/+</sup> | FoxO4 <sup>+/-</sup> | FoxO4 <sup>-/-</sup> |
|----------------------------------|----------------------|----------------------|----------------------|
| Lymphoma                         | 34.8%<br>(8/23)      | 29.4%<br>(5/17)      | 57.7%<br>(15/26)     |
| Lung adenoma/carcinoma           | 78.3%<br>(18/23)     | 58.8%<br>(10/17)     | 73.1%<br>(19/26)     |
| Skin papilloma                   | 13%<br>(3/23)        | 17.6%<br>(3/17)      | 19.2%<br>(5/26)      |
| Angiosarcoma in Uterus (females) | 0%<br>(0/5)          | 17.6%<br>(3/17)      | 15.4%<br>(2/13)      |

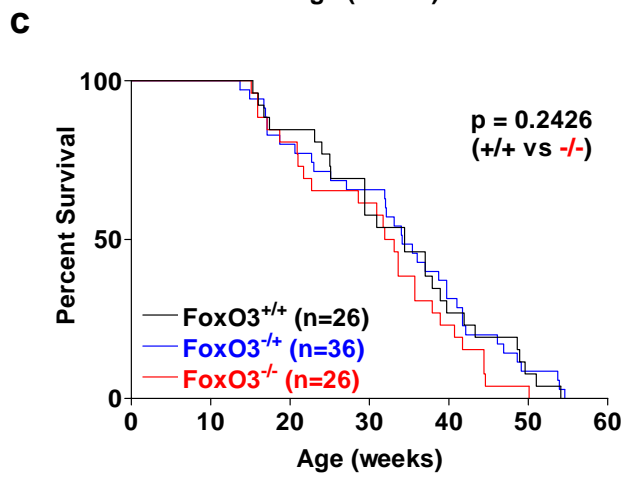

**d**

| Tumor Type                       | FoxO3 <sup>+/+</sup> | FoxO3 <sup>+/-</sup> | FoxO3 <sup>-/-</sup> |
|----------------------------------|----------------------|----------------------|----------------------|
| Lymphoma                         | 34.6%<br>(9/26)      | 33.3%<br>(12/36)     | 38.5%<br>(10/26)     |
| Lung adenoma/carcinoma           | 84.6%<br>(22/26)     | 75%<br>(27/36)       | 61.5%<br>(16/26)     |
| Skin papilloma                   | 11.5%<br>(3/26)      | 8.3%<br>(3/36)       | 11.5%<br>(3/26)      |
| Angiosarcoma in uterus (females) | 0%<br>(0/14)         | 29.4%<br>(5/17)      | 12.5%<br>(1/8)       |

Figure S5.



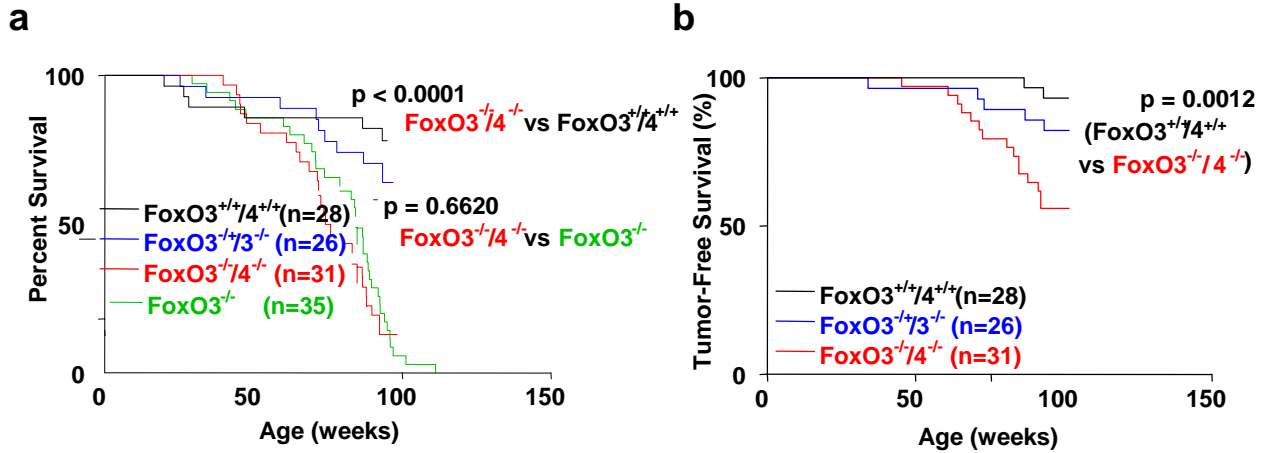

**c**

| Tumor type                         | $\text{FoxO3}^{+/+/4^{+/+}}$ | $\text{FoxO3}^{-+/4^{-}}$ | $\text{FoxO3}^{-/-4^{-}}$ |
|------------------------------------|------------------------------|---------------------------|---------------------------|
| Lung adenoma/carcinoma             | 1/6 (16.7%)                  | 1/9 (11.1%)               | 7/27 (25.9%)              |
| Pituitary adenoma (females)        | 0                            | 1/5 (20%)                 | 6/13 (46.1%)              |
| Pituitary adenoma (males)          | 0                            | 0                         | 0                         |
| Harderian gland adenoma            | 1/6 (16.7%)                  | 2/9 (22.2%)               | 4/27 (14.8%)              |
| Ovarian stromal neoplasm (females) | 0                            | 1/5 (20%)                 | 1/13 (7.7%)               |
| Cystic teratoma (ovary) (females)  | 0                            | 0                         | 2/13 (15.4%)              |
| Other                              | 0                            | 1/9 (11.1%)               | 3/27 (11.1%)              |

Figure S6.

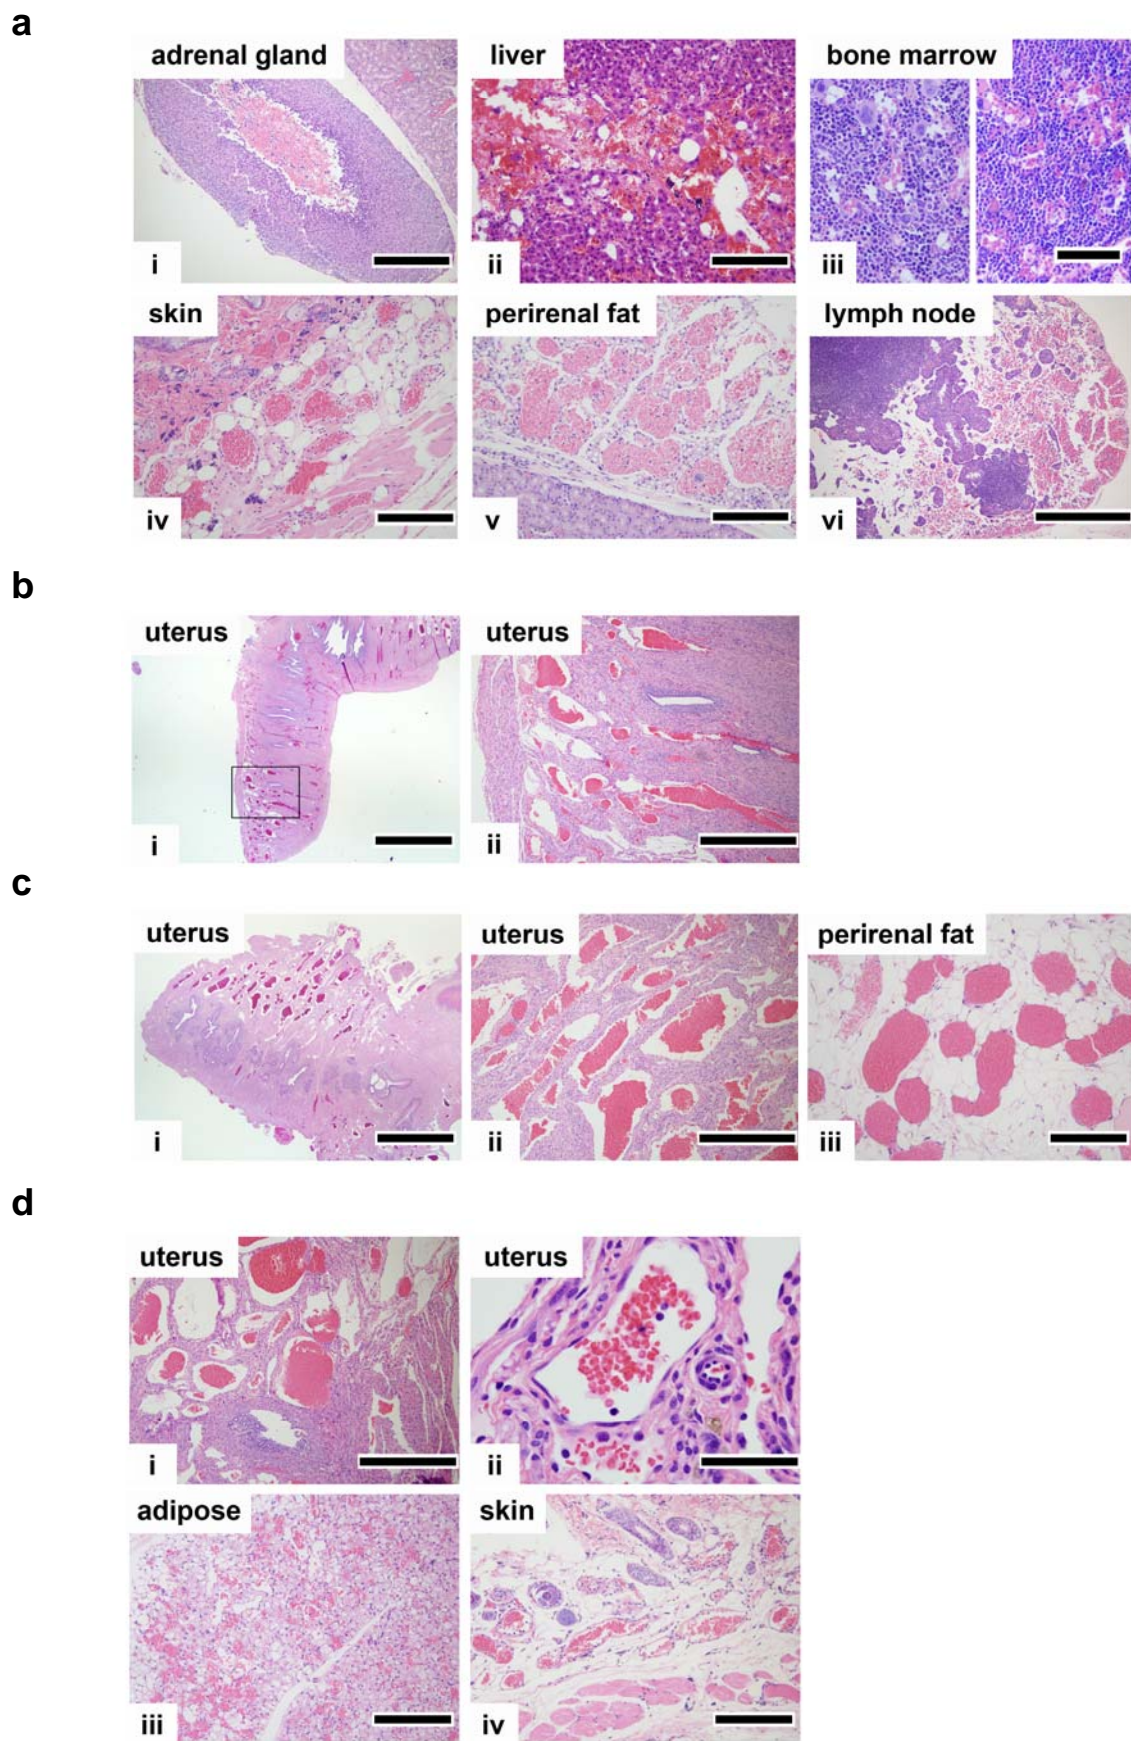

Figure S7.

**a**

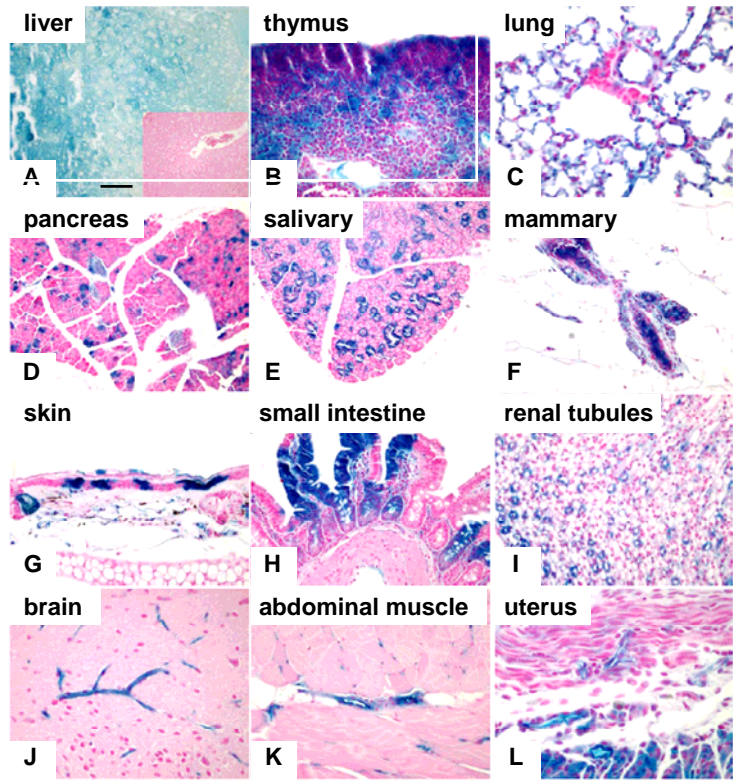

**b**

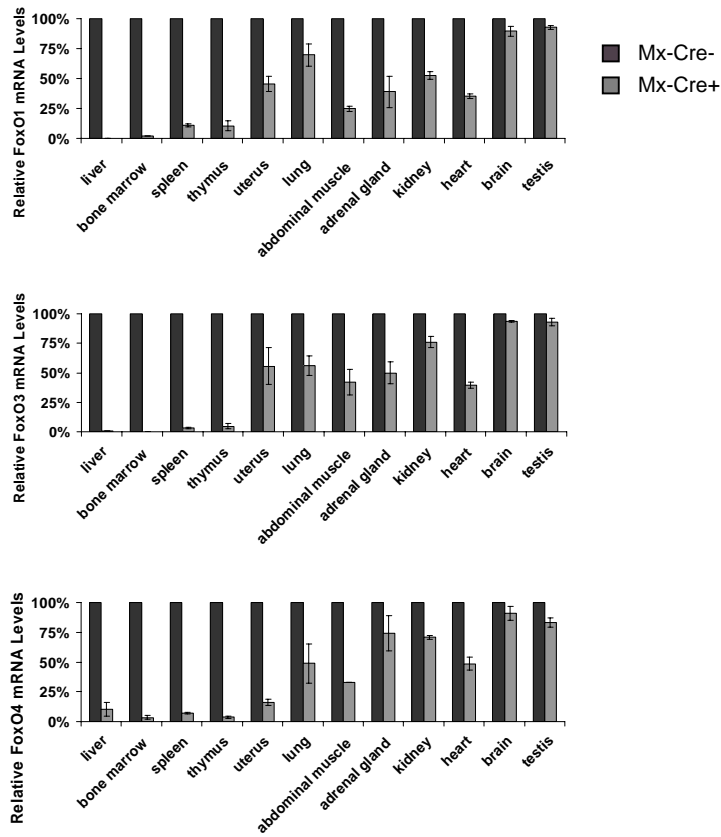

Figure S8.

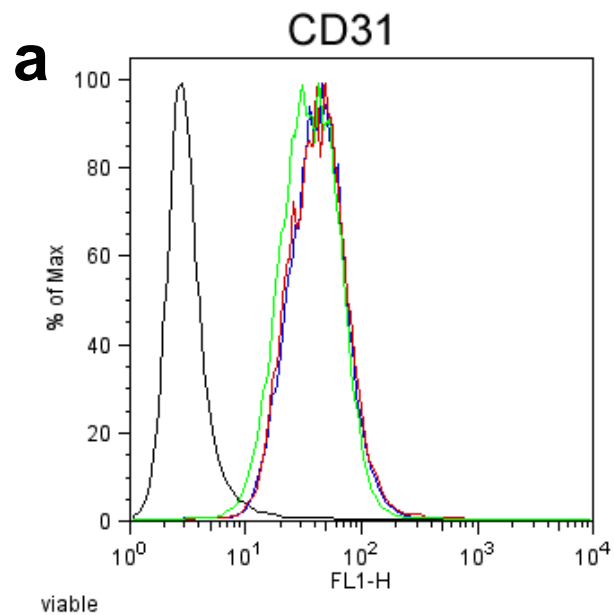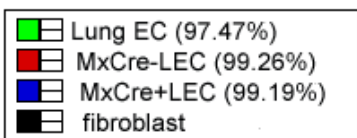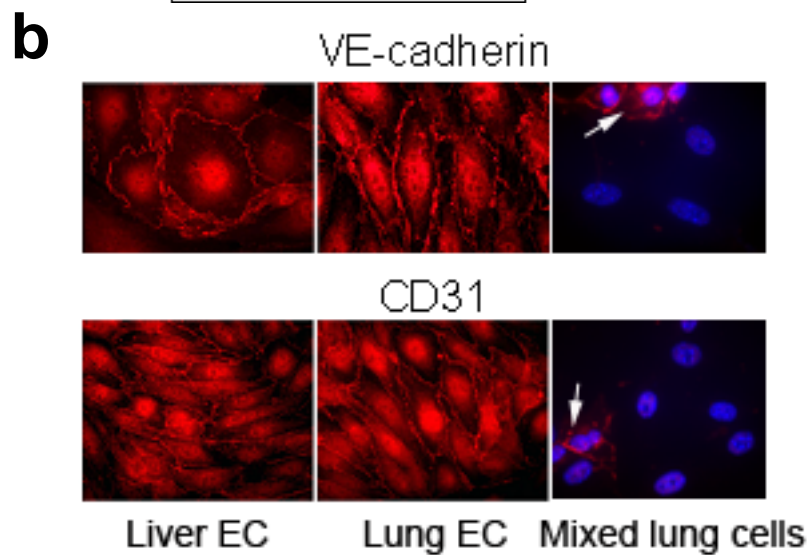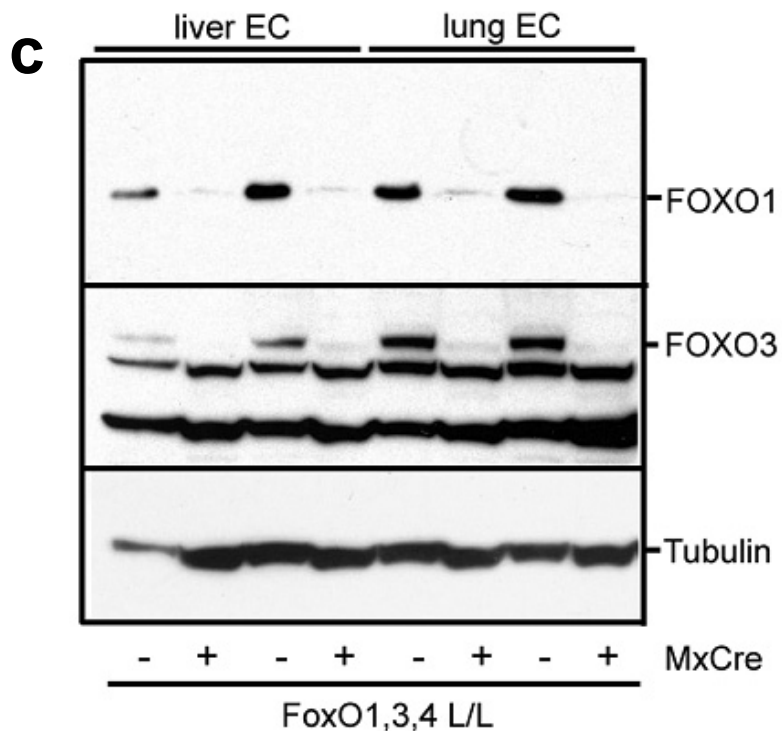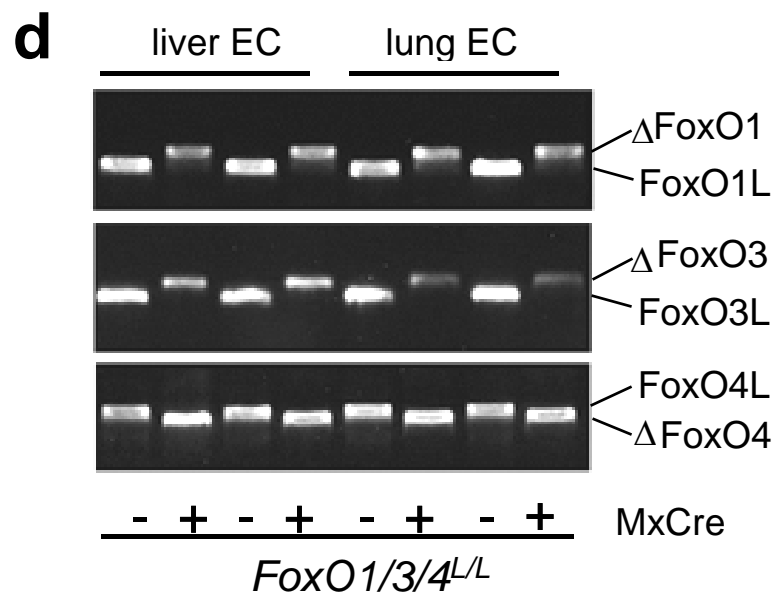



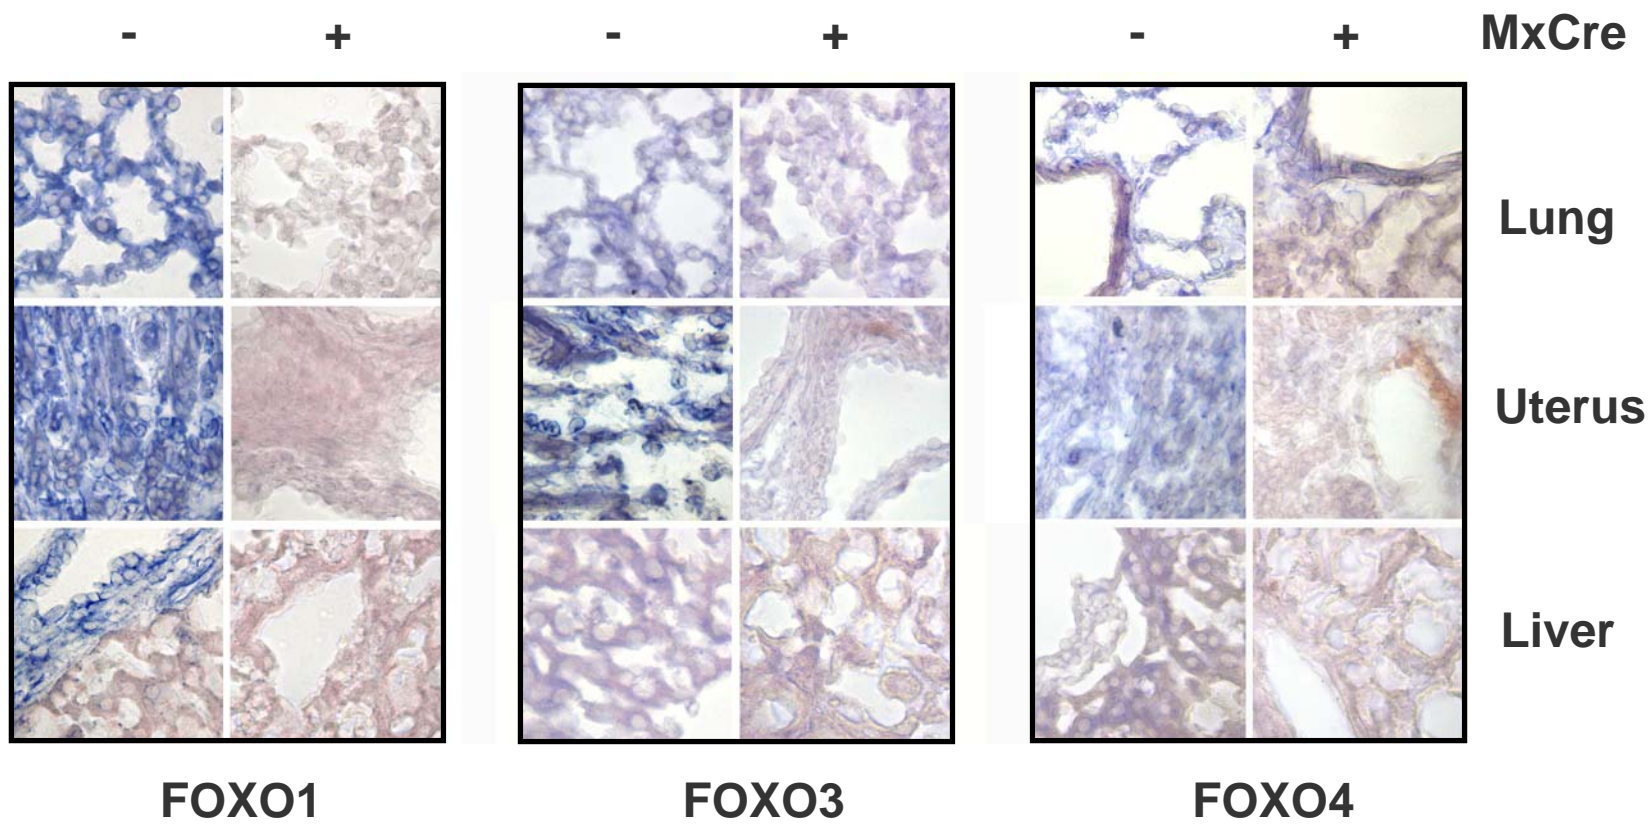

Figure S10.

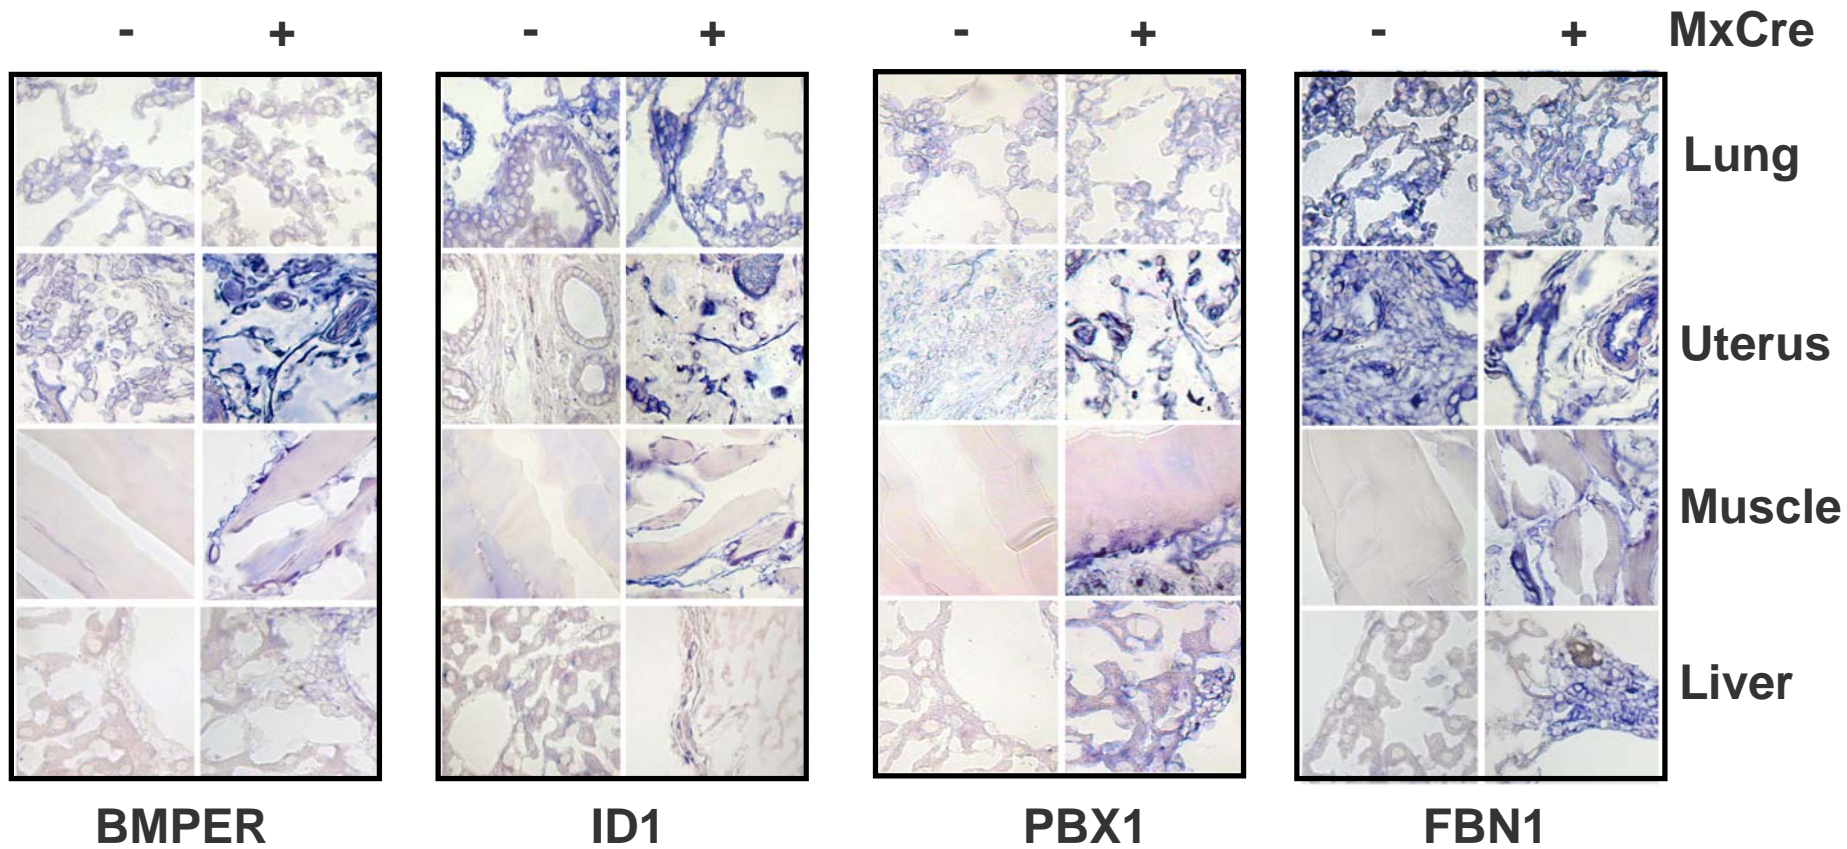

Figure S11.

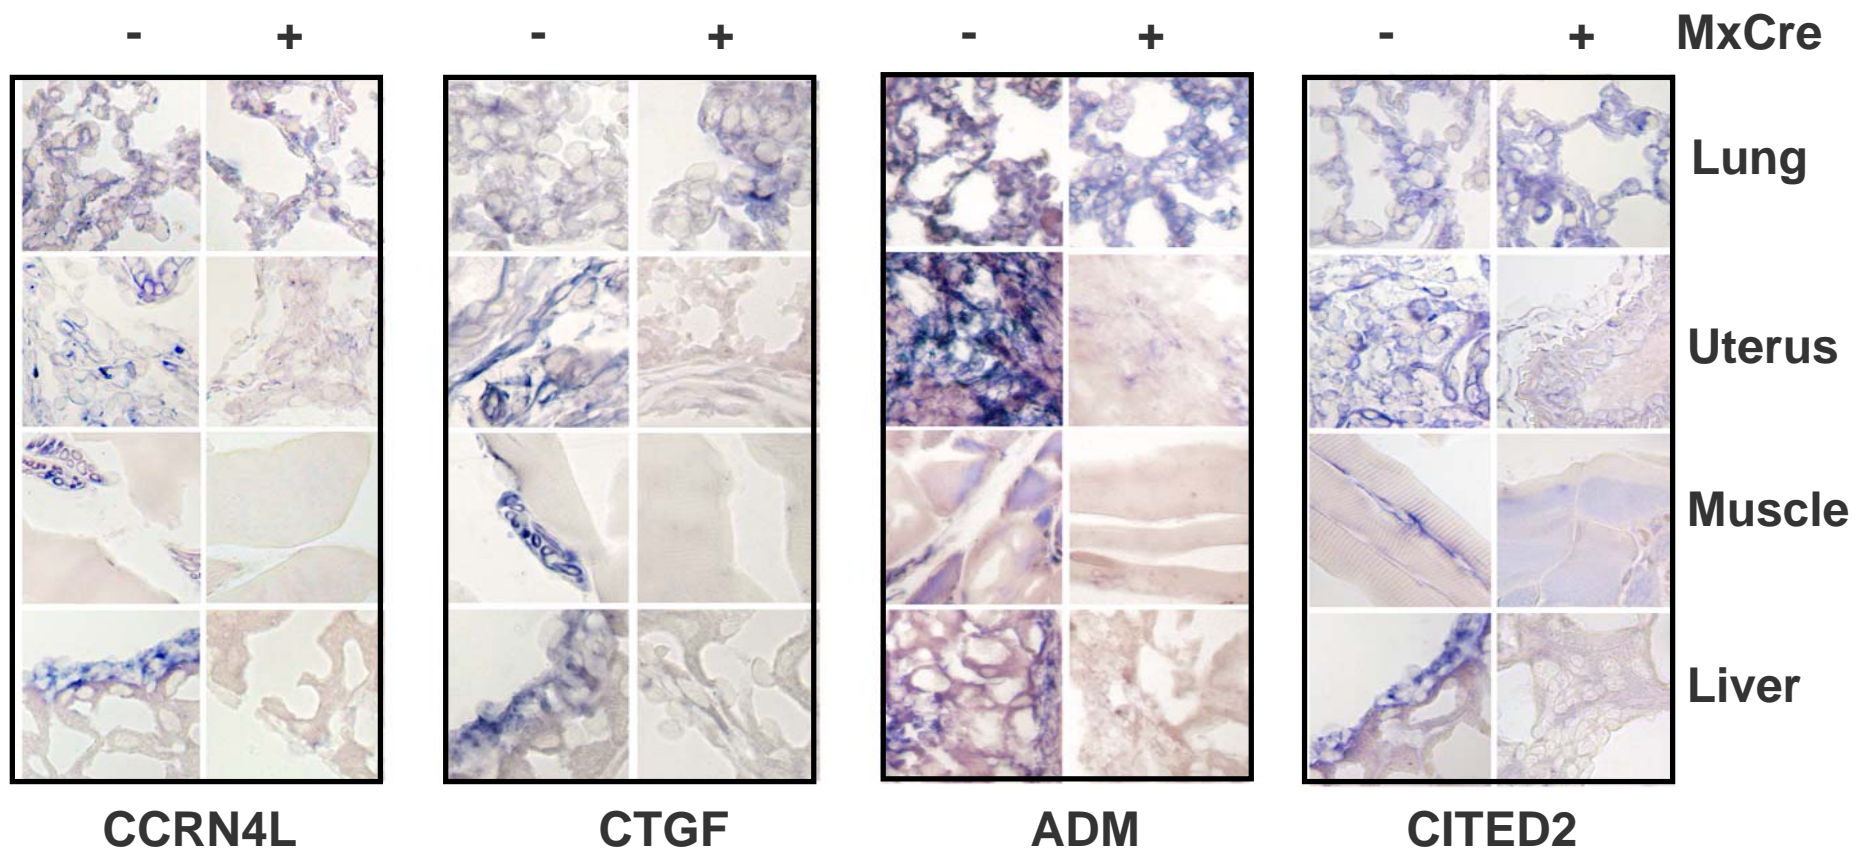

Figure S11.



| Gene      | 5'        | 3'        | direction | score     | sequence   | FoxO Binding by ChIP | primer/product |
|-----------|-----------|-----------|-----------|-----------|------------|----------------------|----------------|
| ADM       | 104482492 | 104482500 | +         | 2.654504  | CCTATTTTA  | YES                  | a              |
|           | 104482529 | 104482537 | +         | 2.417648  | GTTGTTTGG  | NO                   |                |
|           | 104485300 | 104485308 | +         | 3.153852  | GCTATTTTG  | NO                   |                |
|           | 104485795 | 104485803 | +         | 3.102175  | TTTGTTTTG  |                      |                |
|           | 104486018 | 104486026 | +         | 3.173715  | GCTATTTTG  | YES                  | b              |
| CITED2    | 17642263  | 17642271  | +         | 3.390792  | CTTGTTTTG  | YES                  | c              |
|           | 17646180  | 17646188  | -         | 2.569584  | GTCGTTTTG  | NO                   |                |
|           | 17649093  | 17649101  | +         | 2.628119  | CTTGTTTCG  |                      |                |
|           | 17649100  | 17649108  | +         | 2.453474  | CGTTTTTTG  | YES                  | d              |
|           | 17649172  | 17649180  | +         | 2.760327  | TTTGTTTTT  |                      |                |
|           | 17651601  | 17651609  | -         | 2.504161  | CTTATTTTT  |                      |                |
|           | 17652443  | 17652451  | -         | 2.566627  | CTTATTTTT  | YES                  | e              |
| 17653197  | 17653205  | +         | 2.884156  | CCTATTTTT |            |                      |                |
| CTGF      | 24569055  | 24569063  | -         | 3.282897  | TCTGTTTTG  | YES                  | f              |
| CCRNL4    | 50887258  | 50887266  | -         | 3.042592  | TCTATTTTG  | YES                  | g              |
|           | 50887724  | 50887732  | +         | 2.513746  | TTTGTTTTA  |                      |                |
|           | 50887731  | 50887739  | -         | 2.665946  | GCTGTTTTA  | YES                  | h              |
|           | 50887785  | 50887793  | -         | 3.153953  | TTTGTTTTG  |                      |                |
| BMPER     | 23114925  | 23114933  | +         | 3.245308  | TCTGTTTTG  | YES                  | i              |
|           | 23117308  | 23117316  | +         | 2.793938  | CTTATTTTT  | YES                  | j              |
|           | 23117378  | 23117386  | +         | 2.979797  | TCTATTTTG  |                      |                |
| MRC1      | 14155565  | 14155573  | +         | 3.089344  | CCTGTTTTT  | YES                  | k              |
| PBX1      | 168089438 | 168089446 | -         | 3.156608  | TTTGTTTTG  | NO                   |                |
|           | 168089827 | 168089835 | +         | 3.324043  | CCTGTTTTG  |                      |                |
|           | 168090150 | 168090158 | -         | 2.534098  | TTTATTTTT  |                      |                |
|           | 168365064 | 168365072 | -         | 3.041705  | TCTGTTTTT  |                      |                |
|           | 168365317 | 168365325 | +         | 2.661249  | TTTATTTTTG | YES                  | l              |
|           | 168365472 | 168365480 | +         | 3.339045  | CGTGTTTTT  |                      |                |
|           | 168365708 | 168365716 | -         | 3.012654  | CTTGTTTTT  |                      |                |
| 168367416 | 168367424 | -         | 2.450942  | TCGGTTTTT | YES        | m                    |                |

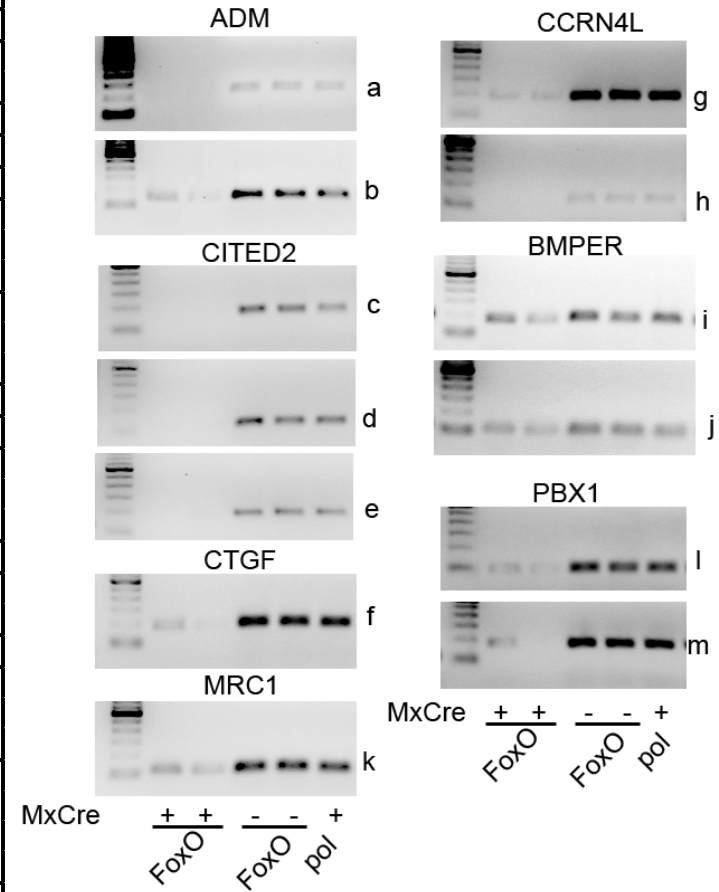

Figure S12.



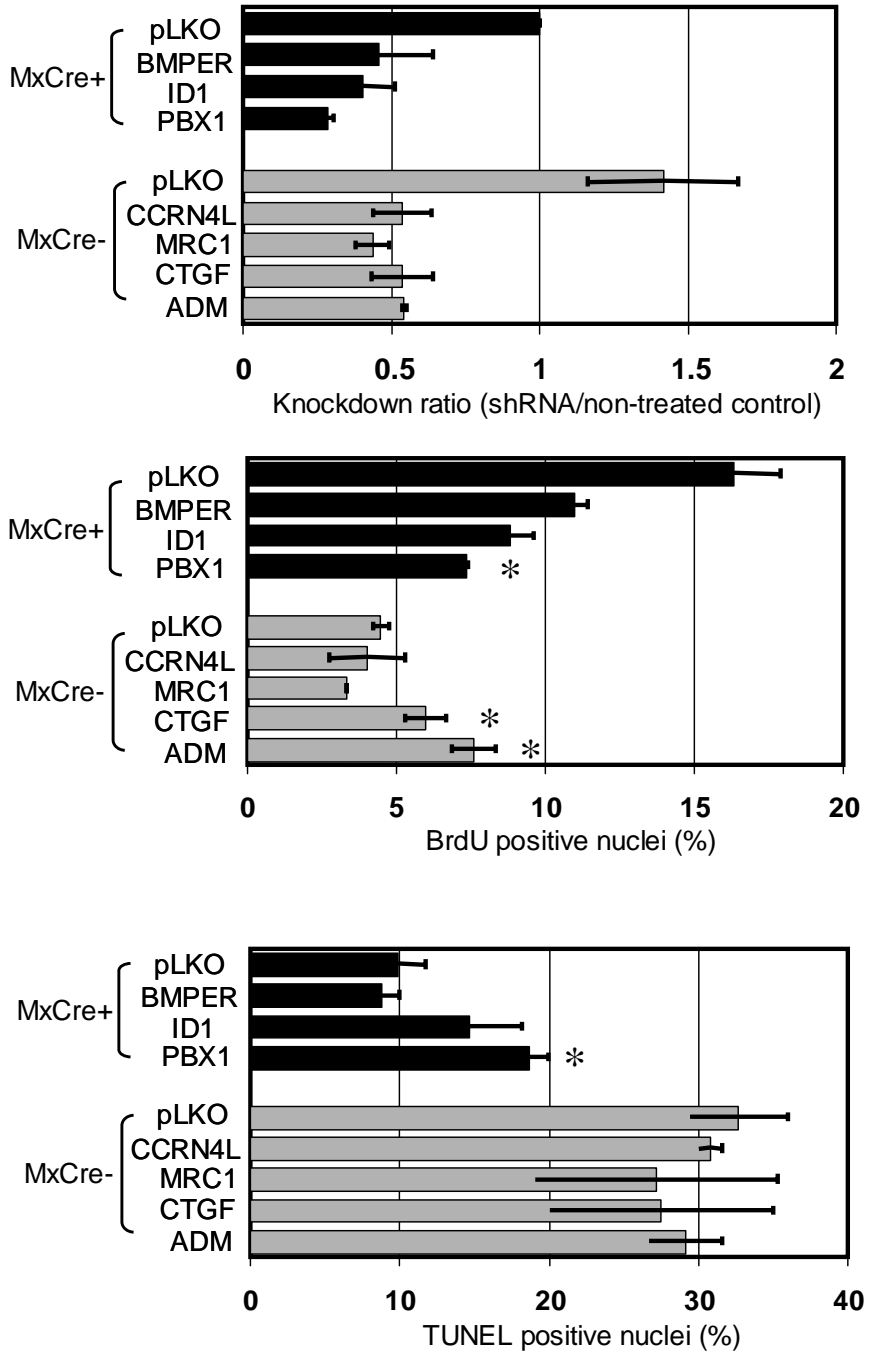

Figure S13.

**Supplementary Table S1: Tumor spectra of mice with germline mutation of a single FoxO gene**

|              | <b>Tumor Type</b>               | <b>+/+</b>    | <b>-/+</b>    | <b>-/-</b>    |
|--------------|---------------------------------|---------------|---------------|---------------|
| <b>FoxO1</b> | Lung adenoma/adenocarcinoma     | 11/31 (35.5%) | 21/52 (40.4%) |               |
|              | Pituitary adenoma (females)     | 6/21 (28.6%)  | 4/29 (13.8%)  |               |
|              | Pituitary adenoma (males)       | 1/10 (10%)    | 0             |               |
|              | Hepatocellular carcinoma        | 2/31 (6.5%)   | 3/52 (5.8%)   |               |
|              | Lymphoma                        | 2/31 (6.5%)   | 1/52 (1.9%)   |               |
|              | Hemangioma                      | 0             | 1/52 (1.9%)   |               |
|              | Angiolipoma                     | 0             | 2/52 (3.8%)   |               |
|              | Uterine Sarcoma NOS (females)   | 1/21 (4.8%)   | 1/29 (3.4%)   |               |
|              | Sarcoma NOS                     | 1/31 (3.2%)   | 1/52 (1.9%)   |               |
|              | Breast carcinoma (females)      | 1/21 (4.8%)   | 1/29 (3.4%)   |               |
|              | Other                           | 0             | 5/52 (9.6%)   |               |
| <b>FoxO4</b> | Lung adenoma/adenocarcinoma     | 7/26 (26.9%)  | 5/15 (33.3%)  | 17/37 (45.9%) |
|              | Pituitary adenoma (females)     | 0/11          | 2/15 (13.3%)  | 6/19 (31.6%)  |
|              | Pituitary adenoma (males)       | 0             | 0             | 0             |
|              | Breast carcinoma (females)      | 0             | 1/15 (6.7%)   | 2/19 (10.5%)  |
|              | Uterine sarcoma NOS (females)   | 3/11 (27.3%)  | 0             | 1/19 (5.2%)   |
|              | Hemangioma (in uterine horn)    | 1/26 (3.8%)   | 0             | 0             |
|              | Other                           | 1/26 (3.8%)   | 0             | 4/37 (10.8%)  |
| <b>FoxO3</b> | Lung adenoma/adenocarcinoma     | 11/22 (50%)   | 5/20 (25%)    | 8/35 (22.9%)  |
|              | Ovarian stromal tumor (females) | 0             | 1/8 (12.5%)   | 4/16 (25%)    |
|              | Pituitary adenoma (females)     | 1/10 (10%)    | 1/8 (12.5%)   | 7/16 (43.8%)  |
|              | Pituitary adenoma (males)       | 0             | 0             | 0             |
|              | Harderian gland adenoma         | 2/22 (9.1%)   | 3/20 (15%)    | 2/35 (5.7%)   |
|              | Hepatocellular carcinoma        | 0             | 2/20 (10%)    | 1/35 (2.9%)   |
|              | Lymphoma                        | 0             | 1/20 (5%)     | 3/35 (8.6%)   |
|              | Breast carcinoma (females)      | 2/10 (20%)    | 0             | 0             |
|              | Pheochromocytoma                | 1/22 (4.5%)   | 0             | 1/35 (2.9%)   |
|              | Hemangioma (in liver)           | 0             | 0             | 1/35 (2.9%)   |
|              | Other                           | 3/22 (13.6%)  | 0             | 3/35 (8.6%)   |
